# Supplementary material for: Multifunctional Hydrogel with Mild Photothermal Properties Enhances Diabetic Wound Repair by Targeting MRSA Energy Metabolism
Source: Research Square preprint supplement (doi:10.21203/rs.3.rs-6086754/v1), 2025-05-04
Supplement: Supplementary file 1 [file 057da98cc8a9505543d2597b.xlsx]

## Sheet: Sheet1
Sample Name	Raw read	Clean Reads	Clean Bases (bp)	Clean Error Rate (%)	Clean Q20(%)	Clean Q30(%)
CTRL1	22248574	22104398	3267181270	0.0125	98.42	95.18
CTRL2	25415196	25201136	3705792200	0.0125	98.39	95.1
CTRL3	23021240	22832930	3377293190	0.0125	98.39	95.07
Sample1	24965384	24821396	3683195174	0.0126	98.32	94.93
Sample2	26133324	25936282	3849977942	0.0125	98.38	95.09
Sample3	22614162	22446552	3319466206	0.0124	98.46	95.3
