# Supplementary material for: Multifunctional Hydrogel with Mild Photothermal Properties Enhances Diabetic Wound Repair by Targeting MRSA Energy Metabolism
Source: Research Square preprint supplement (doi:10.21203/rs.3.rs-6086754/v1), 2025-05-04
Supplement: Supplementary file 2 [file 743b53c28170e7a64e8572f6.xlsx]

## Sheet: Sheet1
Properties	COG-Z@P200	Chitosan-based Dressings[1, 2]	Collagen-based Dressings[3, 4]	Silver Nanoparticle-based Dressings[5]
Antibacterial Efficacy	Highly effective against MRSA with dual-action: Zn²⁺ release and NIR. Synergistic antibacterial effect.	Moderate antibacterial activity, mainly against Gram-positive bacteria through positive charge interaction with bacterial membranes.	Weaker antibacterial properties compared to others, mainly promoting healing.	Highly effective against a broad range of bacteria, including MRSA, but concerns over cytotoxicity and accumulation.
Mechanical Properties	High elasticity and gel strength, self-healing properties, maintains stability under dynamic conditions.	Flexible, but lacks mechanical strength under high tension, not ideal for all wound types.	Provides excellent biocompatibility and tissue regeneration, but may lack robustness for high-tension wounds.	Mechanical strength varies based on matrix material, silver nanoparticles do not contribute to mechanical integrity.
Biodegradability	Biodegradable, ZIF-8 and polydopamine break down into non-toxic byproducts.	Biodegradable, chitosan breaks down enzymatically in the body.	Collagen is naturally biodegradable and compatible with human tissue, degradation rate varies.	Biodegradable depending on the matrix, but concerns over silver accumulation in tissues over time.
Wound Healing Potential	Accelerates healing by preventing infection, promoting collagen deposition, re-epithelialization, and angiogenesis.	Good for tissue regeneration, supports moist wound healing but less effective in infection control.	Excellent for tissue regeneration, promoting a moist wound environment, but limited in infection control.	Effective in managing infection, but prolonged use may delay tissue regeneration and increase cytotoxicity risks.
