# Supplementary material for: Multifunctional Hydrogel with Mild Photothermal Properties Enhances Diabetic Wound Repair by Targeting MRSA Energy Metabolism
Source: Research Square preprint supplement (doi:10.21203/rs.3.rs-6086754/v1), 2025-05-04
Supplement: Supplementary file 3 [file e8567c1c30925f0cbdd30fd0.docx]

Supplementary data

**Multifunctional Hydrogel with Mild Photothermal Properties Enhances Diabetic Wound Repair by Targeting MRSA Energy Metabolism**

Qian Gao,a,# Fangfang Hu,a Zihan Chai,a Caiyun Zheng,a Wenhui Zhang,a Ke Pu,a Ziyi Yang,a Yanni Zhang,a Seeram Ramrkrishna,b Xianglong Wu,a* Tingli Lua*

[a] Dr. Q. Gao,# Dr. F. Hu, Dr. Z. Chai, Dr. C Zheng, Ms.W. Zhang, Mr. K. Pu, Ms. Z. Yang, Prof. Y. Zhang, Prof. X. Wu*, Prof. T Lu*

Key Laboratory of Space Bioscience and Biotechnology

Engineering Research Center of Chinese Ministry of Education for Biological Diagnosis, Treatment and Protection Technology and Equipment, School of Life Sciences, Northwestern Polytechnical University

No.127, Friendship West Road, Zhangjiacun Street, Beilin District, Xi'an City, 710072, P.R. China.

E-mail: E-mail: wuxianglong@nwpu.edu.cn; lutinglixinxin@nwpu.edu.cn

[b] Prof. Seeram Ramrkrishna

Department of Mechanical Engineering, College of Design and Engineering, National University of Singapore, Singapore, 21 Lower Kent Ridge Road, 117574, Singapore.

E-mail: seeram@nus.edu.sg.

**Synthesis of ZIF-8 nanoparticles**

First, 0.089 g (0.29 mM) Zn(NO3)2·6H2O and 1.64 g (20 mM) 2-MIm were dissolved in 5.0 mL and 10.0 mL deionized water, respectively, to form solution A and solution B. Solutions A and B were mixed by stirring with a magnetic bar and stirred for 1 hour to obtain a milky white dispersion solution. The residue was collected by centrifugation. The ZIF-8 nanoparticles were washed three times with deionized water, centrifuged at 10,000 rpm, and dried under vacuum at room temperature.

**Synthesis of oxidized sodium alginate (OSA)**

3g of sodium alginate salt was dispersed in 300mL of deionized water. 15mL of 0.5M aqueous sodium periodate was added dropwise and the mixture was stirred at 600 rpm for 2 hours. After adding 15mL of ethylene glycol, stirring continued for 1 hour. The product was then dialyzed (MWCO=3.5 kDa) for 3 days and freeze-dried for 48 hours to obtain the final product.

***In vitro* antibacterial test**

The sterilized hydrogel was placed in a 24-well plate. A 10 μL bacterial suspension (OD = 0.6–0.8) was added to the surface of the hydrogel and irradiated under 808 nm near-infrared light at a power density of 2.0 W/cm² for 0, 3, 5, and 10 minutes, respectively. The 24-well plate was then placed in a constant temperature and humidity incubator at 37°C for incubation. After the hydrogel was co-cultured with bacteria for 2 hours, 1 mL of sterile PBS was added and sonicated for 10 minutes to suspend the bacteria. Following resuspension, 50 μL of the bacterial solution was evenly coated on the surface of a solid medium in a bacterial petri dish using a bacterial applicator stick. The dish was then placed in a constant temperature and humidity incubator at 37°C for 18 hours. The effect of different irradiation times on the antimicrobial properties of the hydrogel was investigated by quantitatively analyzing the surviving bacteria using the colony counting method. Each group of tests was repeated three times, and the results were expressed as the bacterial survival rate.

Bacteria co-cultured with the hydrogel were fixed with a 4% paraformaldehyde solution overnight and dehydrated using 70%, 75%, 80%, 85%, 90%, 95% and 100% ethanol gradients for 15 minutes each. After vacuum freeze-drying at -55°C and gold spraying, bacterial morphology was observed with a scanning electron microscope.

***In vivo* antibacterial experiments**

The MARS infected wound model was used to detect the in vivo antibacterial activity of the hydrogel. Infected tissue was collected from the wound site on day 3 after treatment. The tissue was soaked in 1 mL of sterilized PBS, sonicated for 10 minutes at 3000 rpm, and centrifuged for 4 minutes to collect the bacteria. Then, 50 μL of the resulting bacterial solution was dropped onto an LB agar plate and spread evenly before being incubated at 37 °C for 15 hours. Colony-forming units on the LB agar plates were counted. The remaining bacterial solution was used for live and dead bacterial staining.

**Antioxidant properties of hydrogels**

500 μL of deionized water or 500 mg of freshly produced hydrogel was distributed in 3 mL of DPPH solution (in absolute ethanol, 200 μM), respectively. The solutions were incubated in a constant temperature shaker at 37°C in the dark for 1 hour. The absorbance of the solution at 517 nm was quantified using a UV spectrophotometer. All actions were conducted in darkness. The DPPH radical scavenging rate was computed using formula (5):

(5)

- represents the absorbance of the solution with deionized water at a wavelength of 517 nm; -denotes the absorbance of the solution in the hydrogel group at a wavelength of 517 nm.

Liver hemostasis test

The male C57/BL6 mice were anesthetized using a 0.3% sodium pentobarbital solution at a dosage of 0.1 to 0.2 mL per 10 g of body weight. Hair was excised from the hepatic region, and the surgical site was sterilized with iodine. The liver was revealed through dissection, and the surrounding sludge was meticulously removed with filter paper. A pre-weighed filter paper was positioned on wax paper beneath the liver. Hemorrhaging was initiated by piercing with a 20 G syringe needle, and the pre-manufactured COG-Z@P200 hydrogel patch (100 μL, 6 mm in diameter) was promptly affixed to the wound. After 5 minutes, the blood-saturated filter paper was re-weighed to quantify the extent of bleeding, which was subsequently compared with the control group (no treatment following puncture).

**pH responsive release of Zn2+**

500 μL of the COG-Z@P200 hydrogel was immersed in a centrifuge tube containing 6.0 mL of PBS at different pH levels (pH 7.4, 6.8, and 5.4). The tube was then placed in a 37°C shaker and incubated at 100 rpm. At specific intervals (1 h, 6 h, 12 h, 1 d, 2 d, 3 d, 4 d, 5 d, 6 d and 7 d), 3.0 mL samples were collected and replaced with an equal volume of fresh PBS. At each time point, the samples were irradiated with or without an 808 nm laser. Immediately after each sampling, the samples were centrifuged at 10,000 rpm for 10 min to remove residual Z@P and colloidal impurities. The supernatant was then collected to measure Zn²⁺ concentration using inductively coupled plasma optical emission spectrometry (ICP-OES). The release kinetics of Zn²⁺ were ultimately determined using the Higuchi model equation:

(6)

is the cumulative amount of drug released at time t.

is the Higuchi constant, representing the release rate of the drug.

is the time.

denotes the square root of time, reflecting the characteristic of the diffusion process.

**Immunofluorescence staining**

After dewaxing, hydration, and antigen retrieval, the tissue sections were blocked with 3% BSA (GC305010, Servicebio) for 2 hours at room temperature. The sections were then incubated overnight at 4 °C with TNF-α (1:400, GB11188, Servicebio), dihydroethidium (1:200, D7008, Sigma Aldrich), Arg-1 (1:800, GB112118, Servicebio), CD31 (1:500, GB300604-H, Servicebio), α-SMA (1:1000, GB111364, Servicebio), VEGF (1:400, GB15165, Servicebio), and Col I (1:400, GB11022-3, Servicebio). After washing with PBS, the secondary antibody was added and incubated in the dark for 50 minutes. Images were acquired using a scanner (Pannoramic MIDI, 3DHISTECH) and analyzed with ImageJ software.


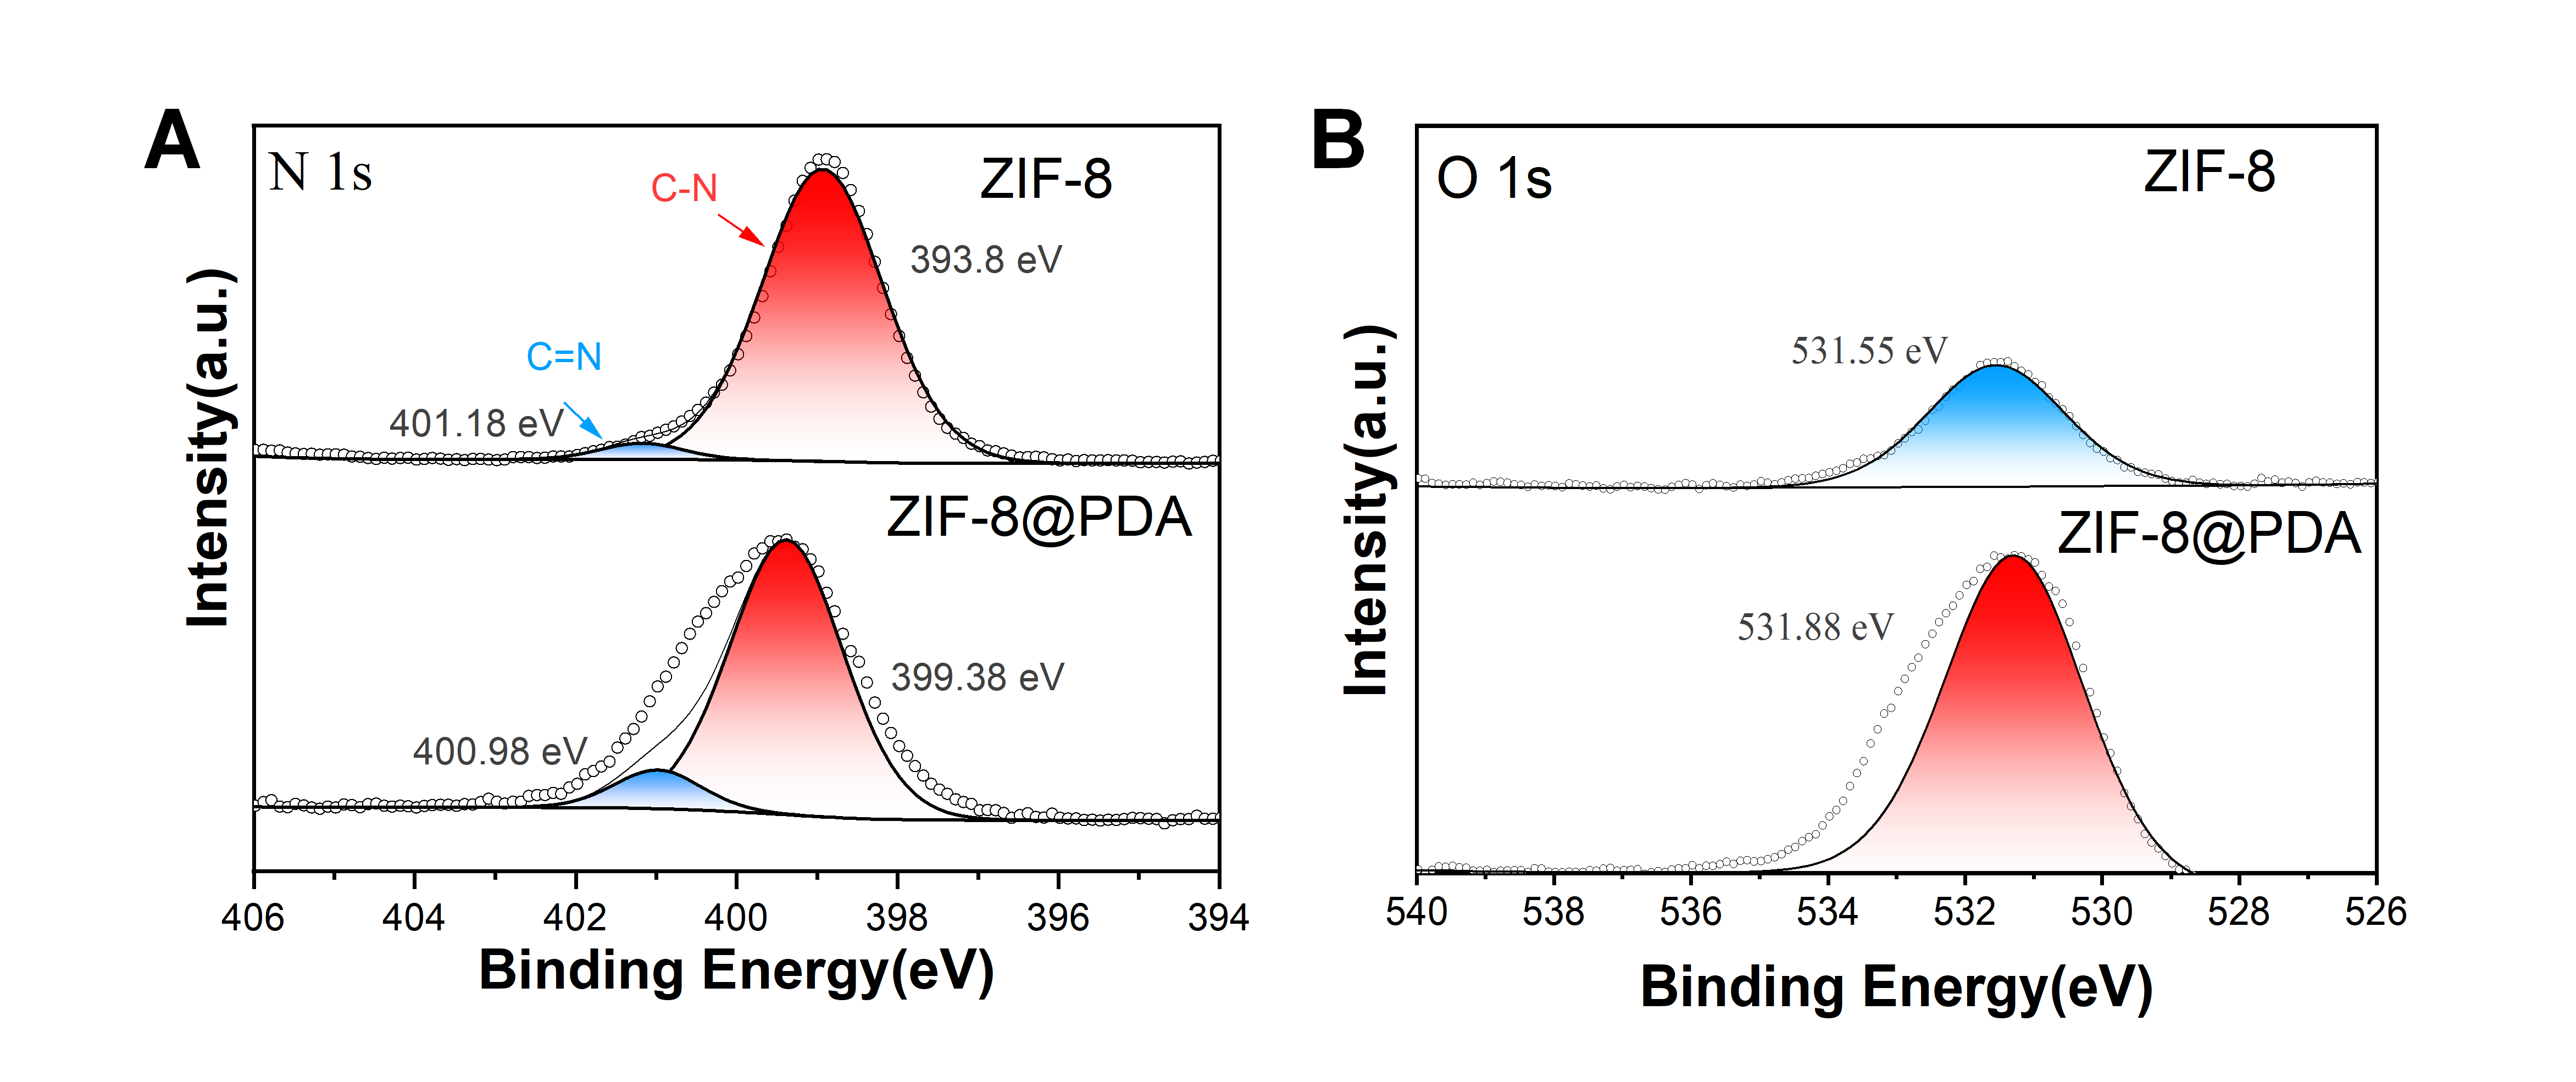


**Figure S1.** XPS analysis.(A) N elements; (B) O elements.


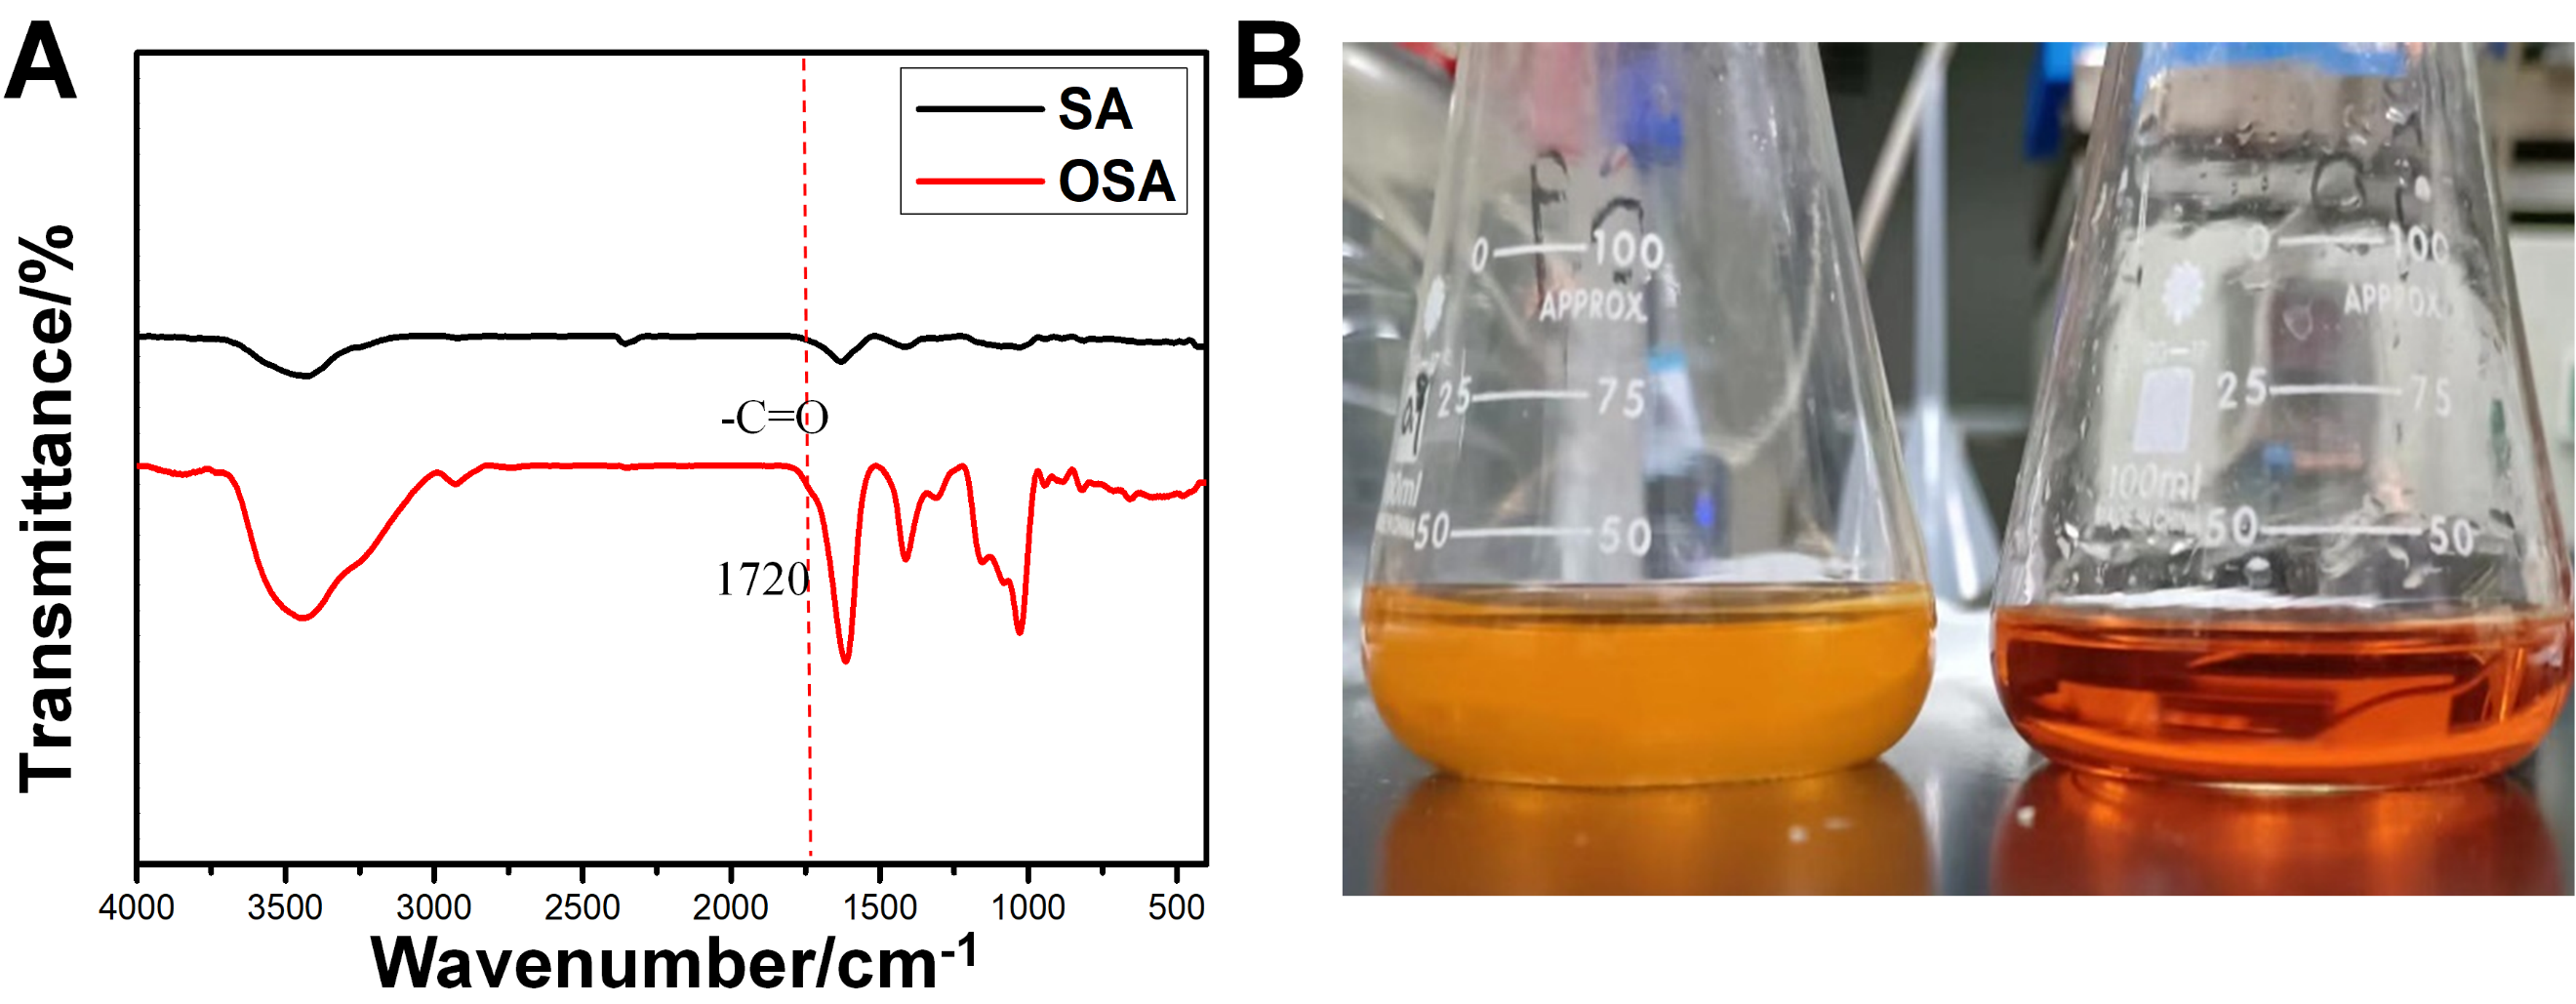


**Figure S2.** Characterization of oxidized sodium alginate. (A) FT-IR spectrum; (B) Hydroxylamine hydrochloride before titration (left), after titration (right).


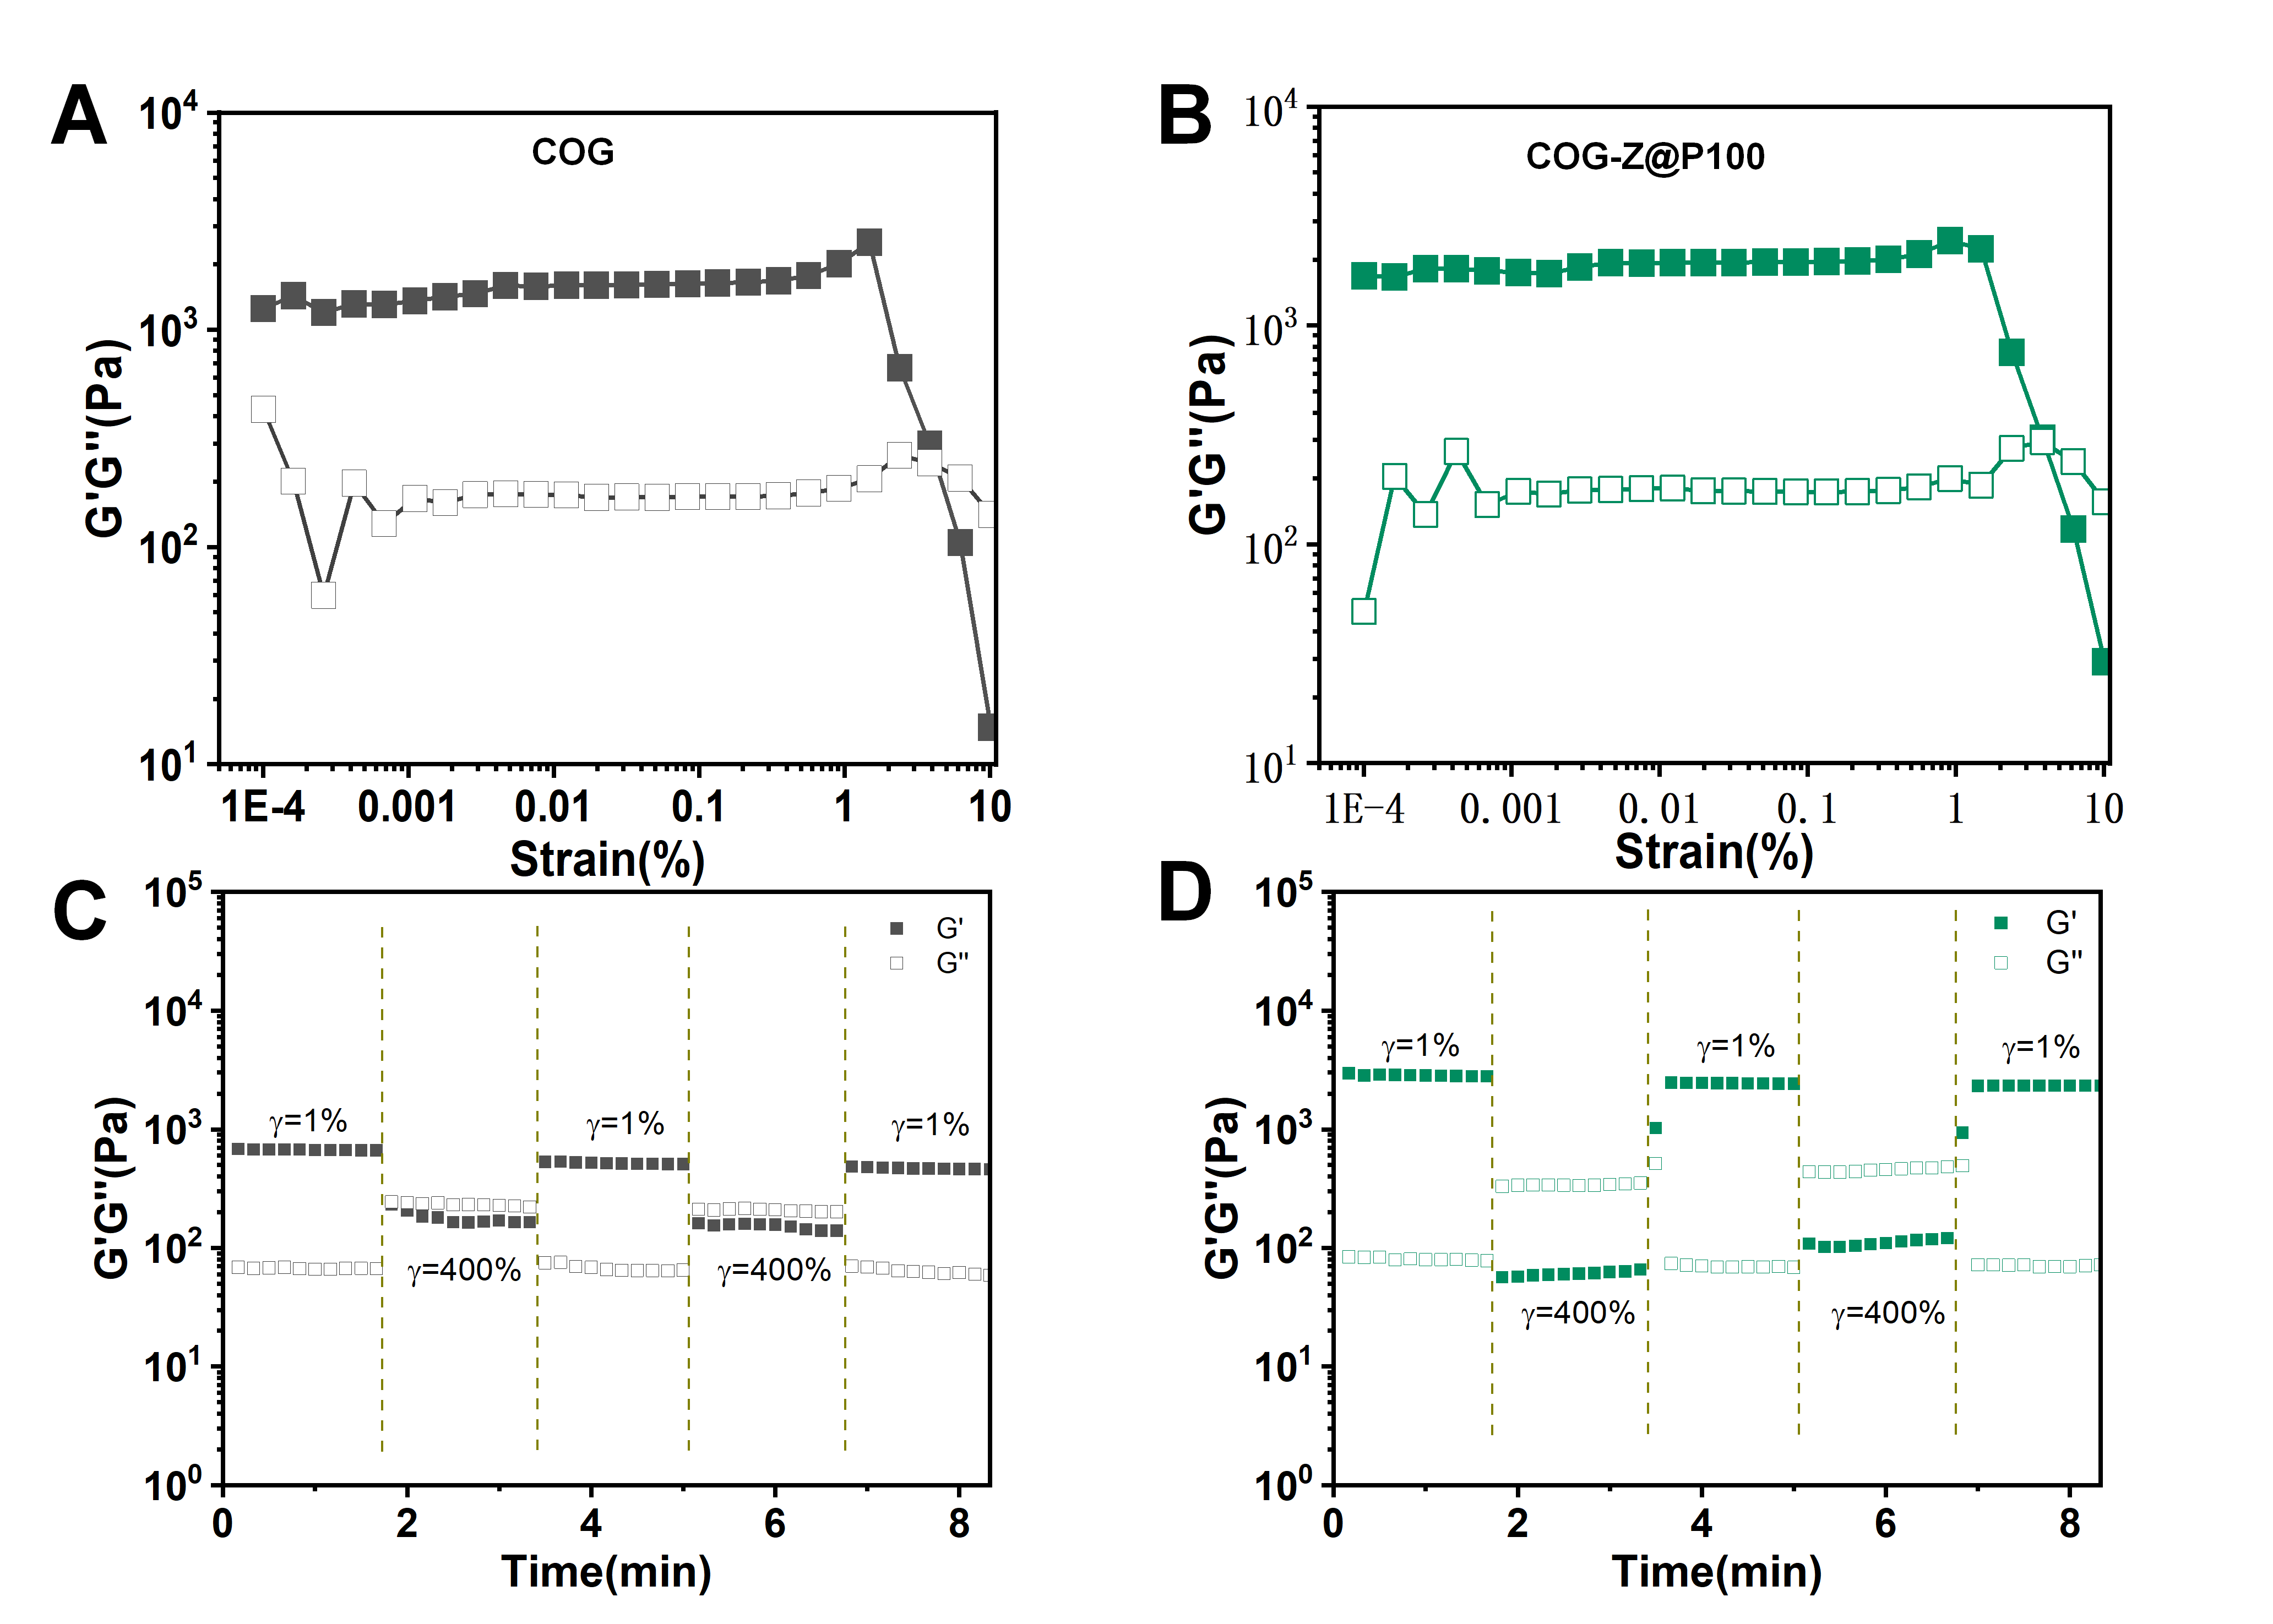


**Figure S3.** Dynamic strain sweep test. (A-B) Cyclic sweep test of COG hydrogel and COG-Z@P100 hydrogel under 1% and 400% shear strain (ω = 1 rad/s).


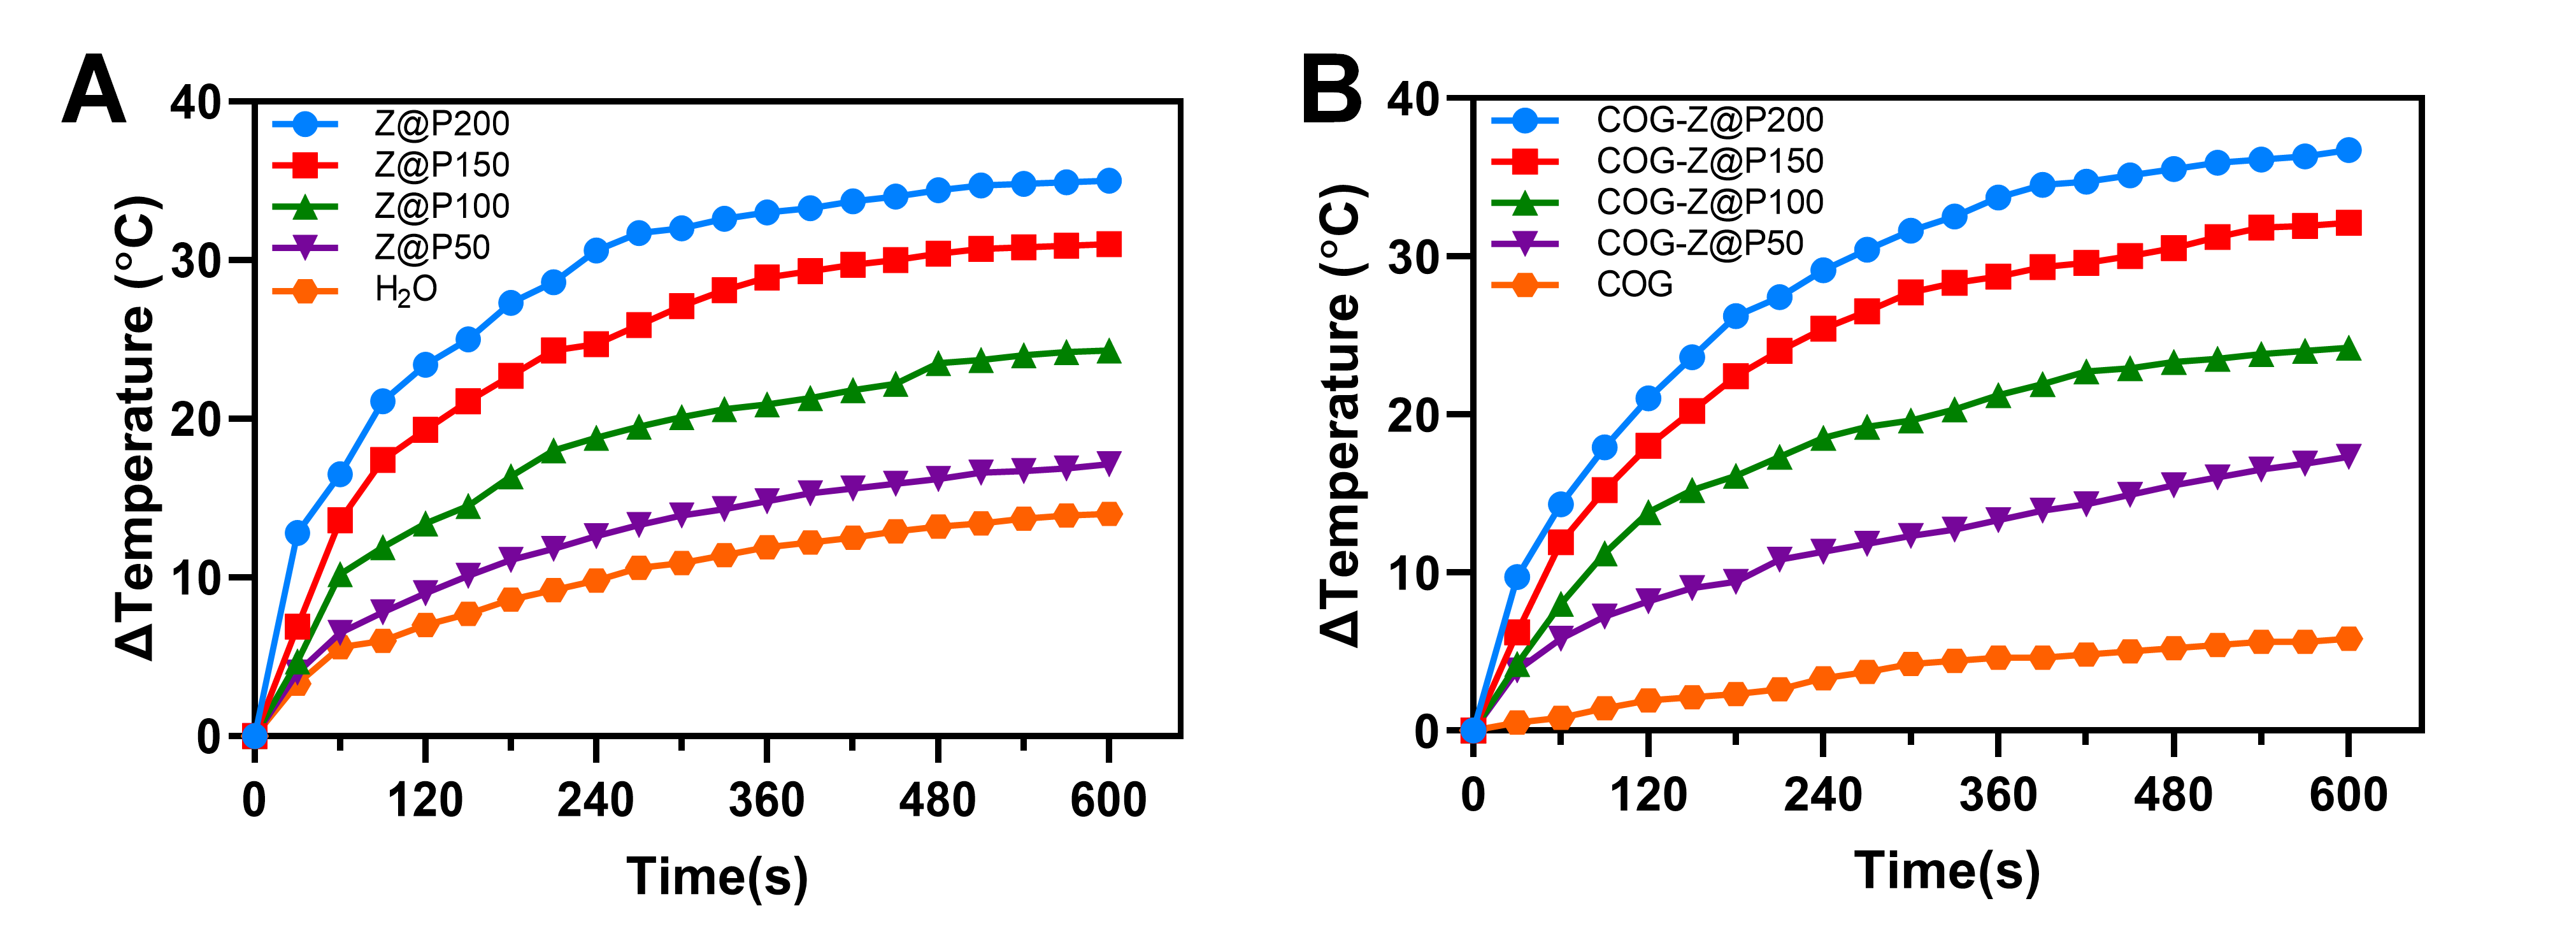


**Figure S4.** Temperature difference curve. (A-B) Temperature difference (ΔT) variation curves of different concentrations of ZIF-8@PDA NPs and COG-Z@P hydrogel with laser irradiation time.


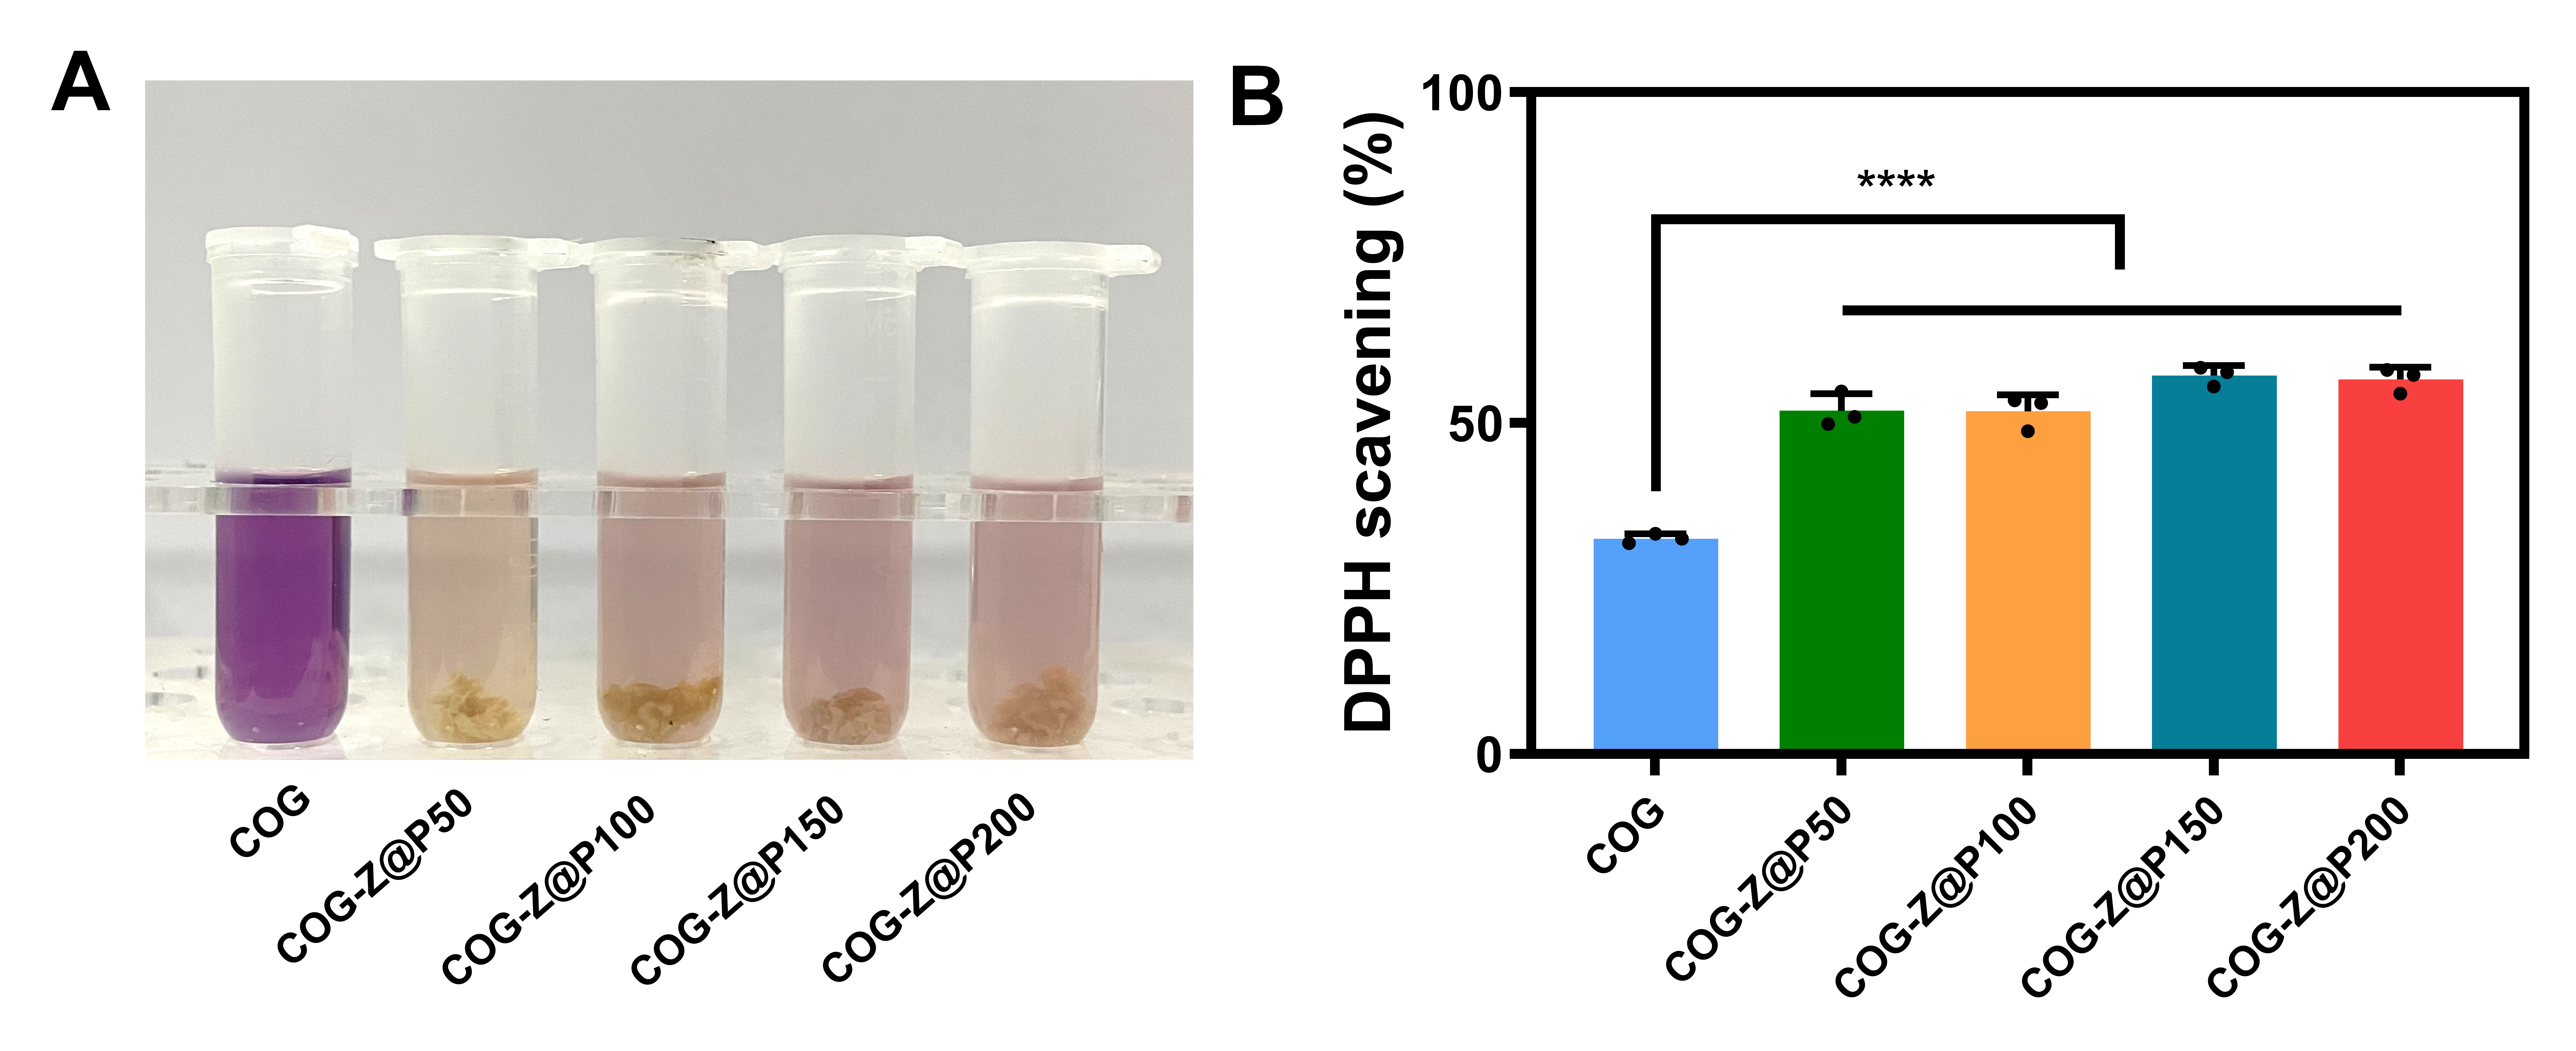


**Figure S5.** DPPH scavenging ability of hydrogels. (A) Color changes of solutions after co-culture with DPPH in different groups; (B) Free radical scavenging rate of hydrogel, n = 3.


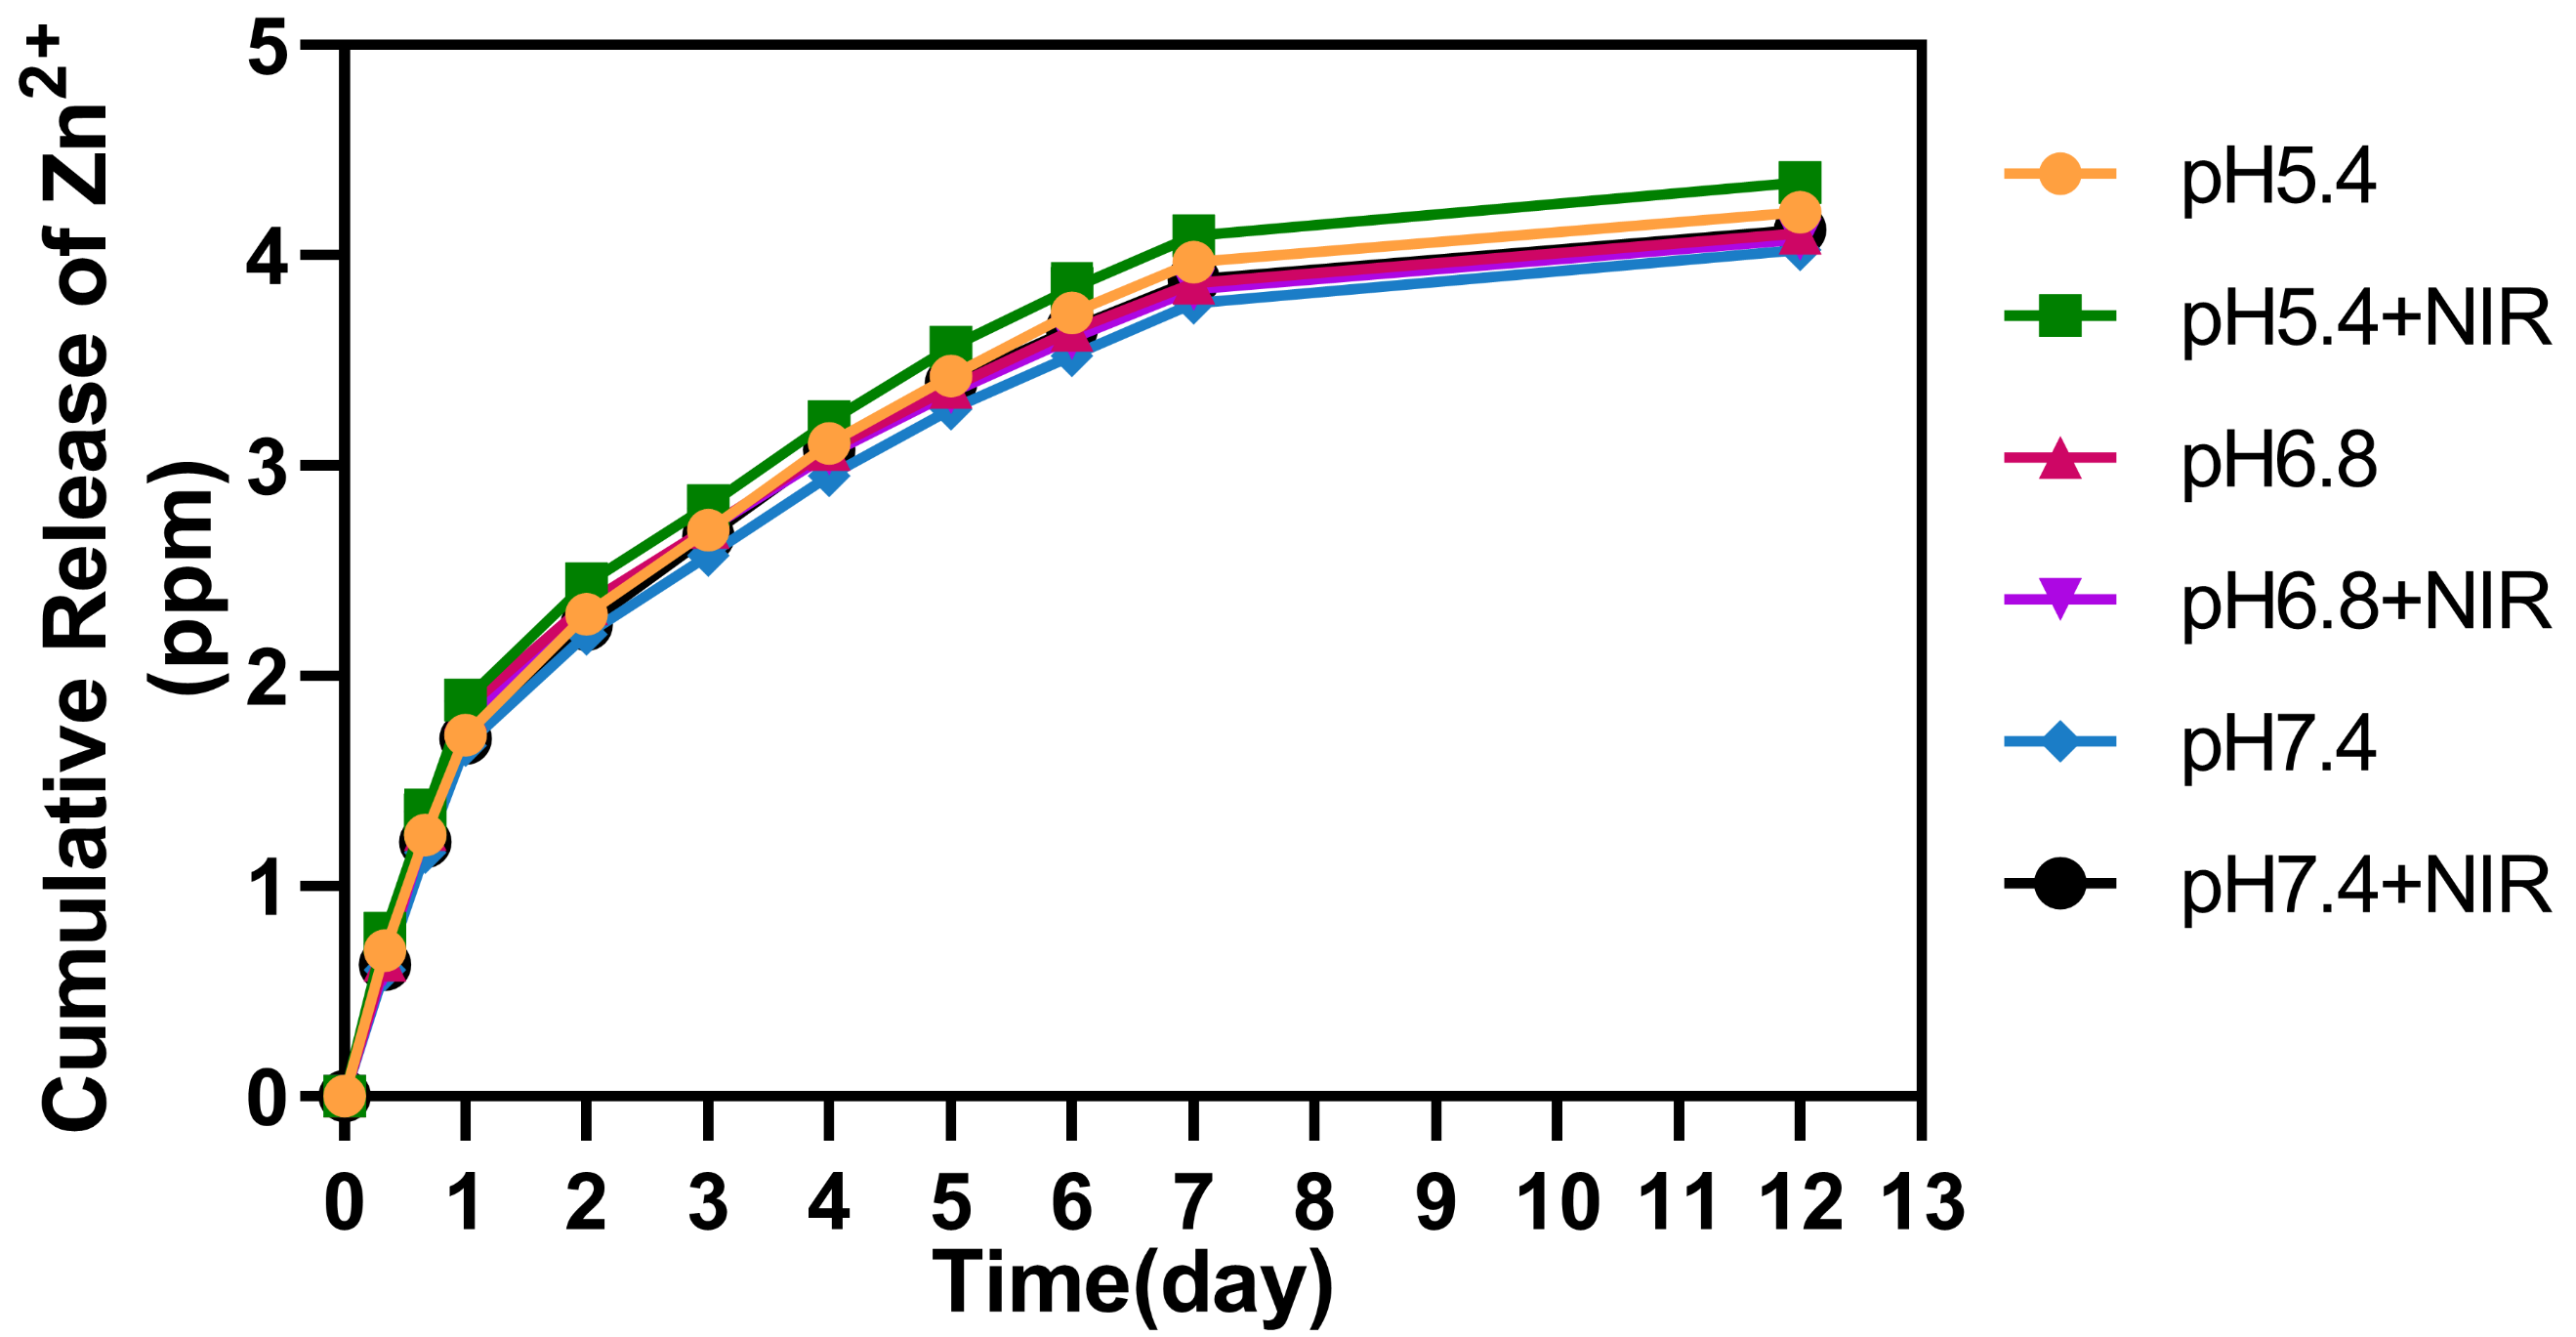


**Figure S6.** Release curves of Zn2+ over time at different pH.


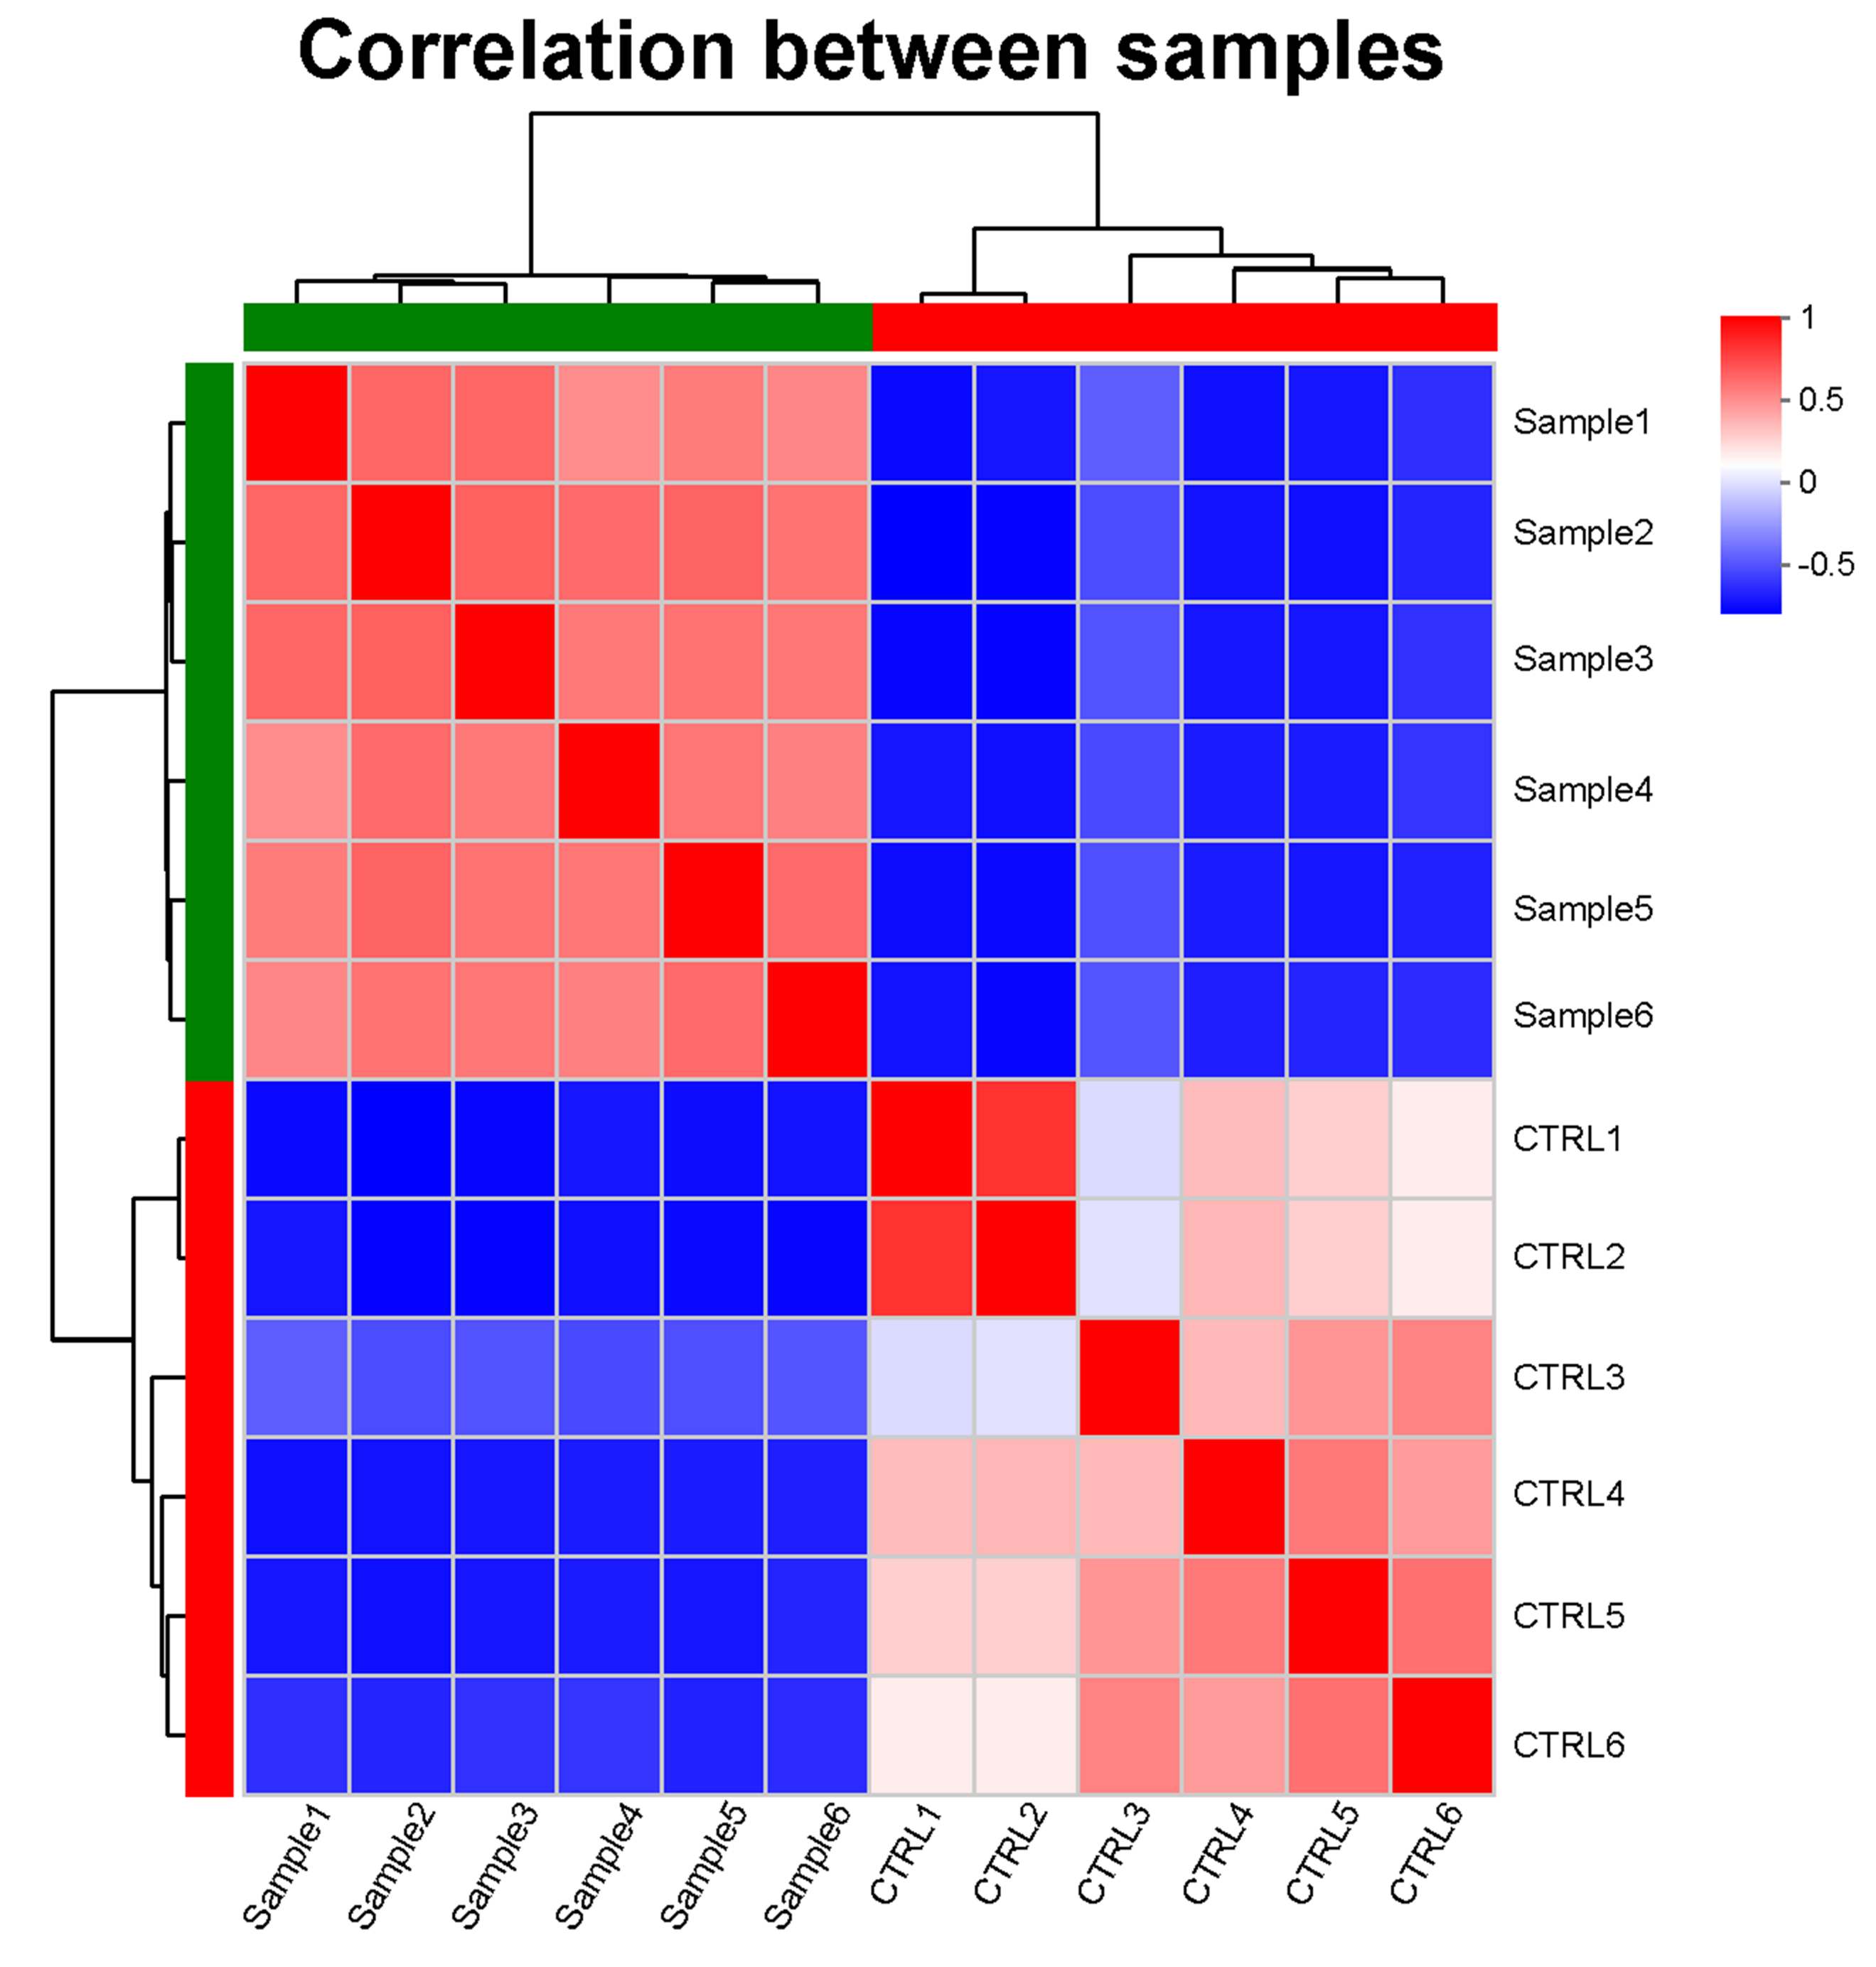


**Figure S7.** Correlation clustering heatmap between CTRL group and Sample group.


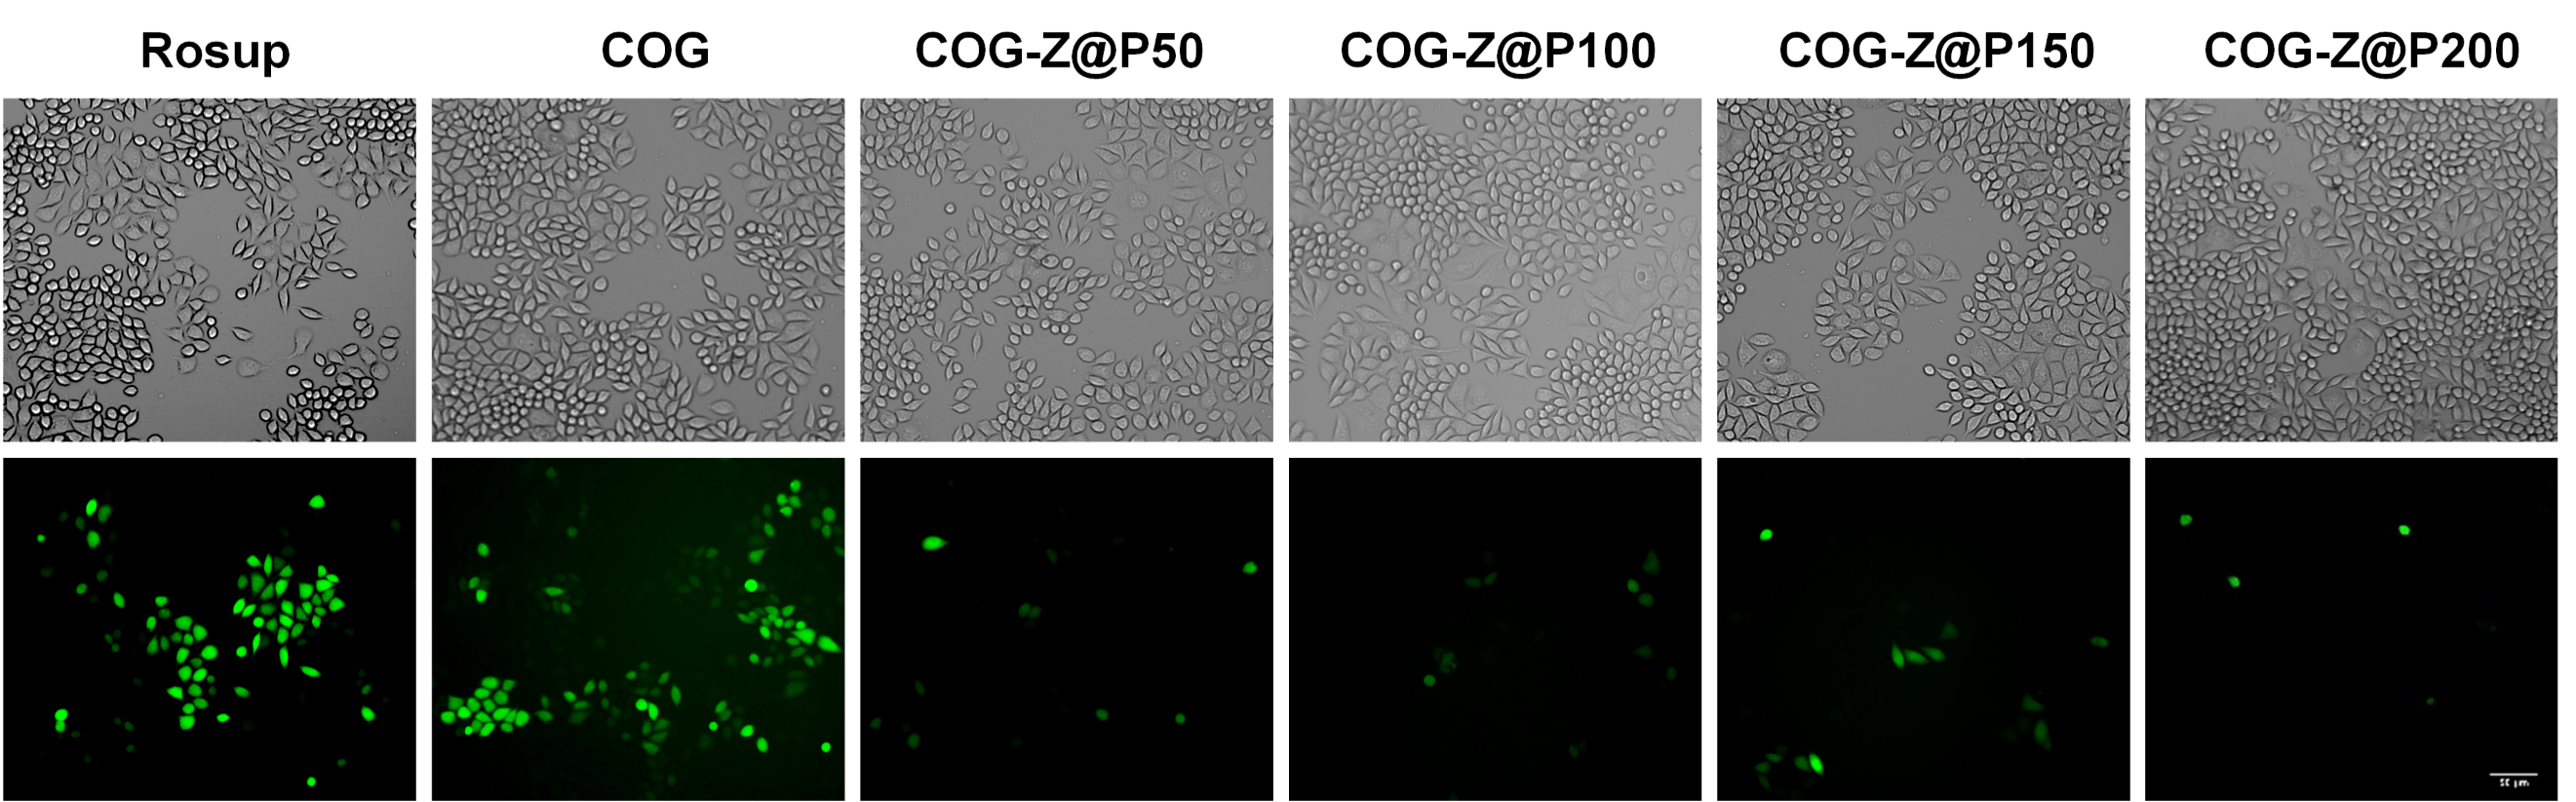


**Figure S8.** Changes in ROS levels in L929 cells after Rosup induces oxidative stress.


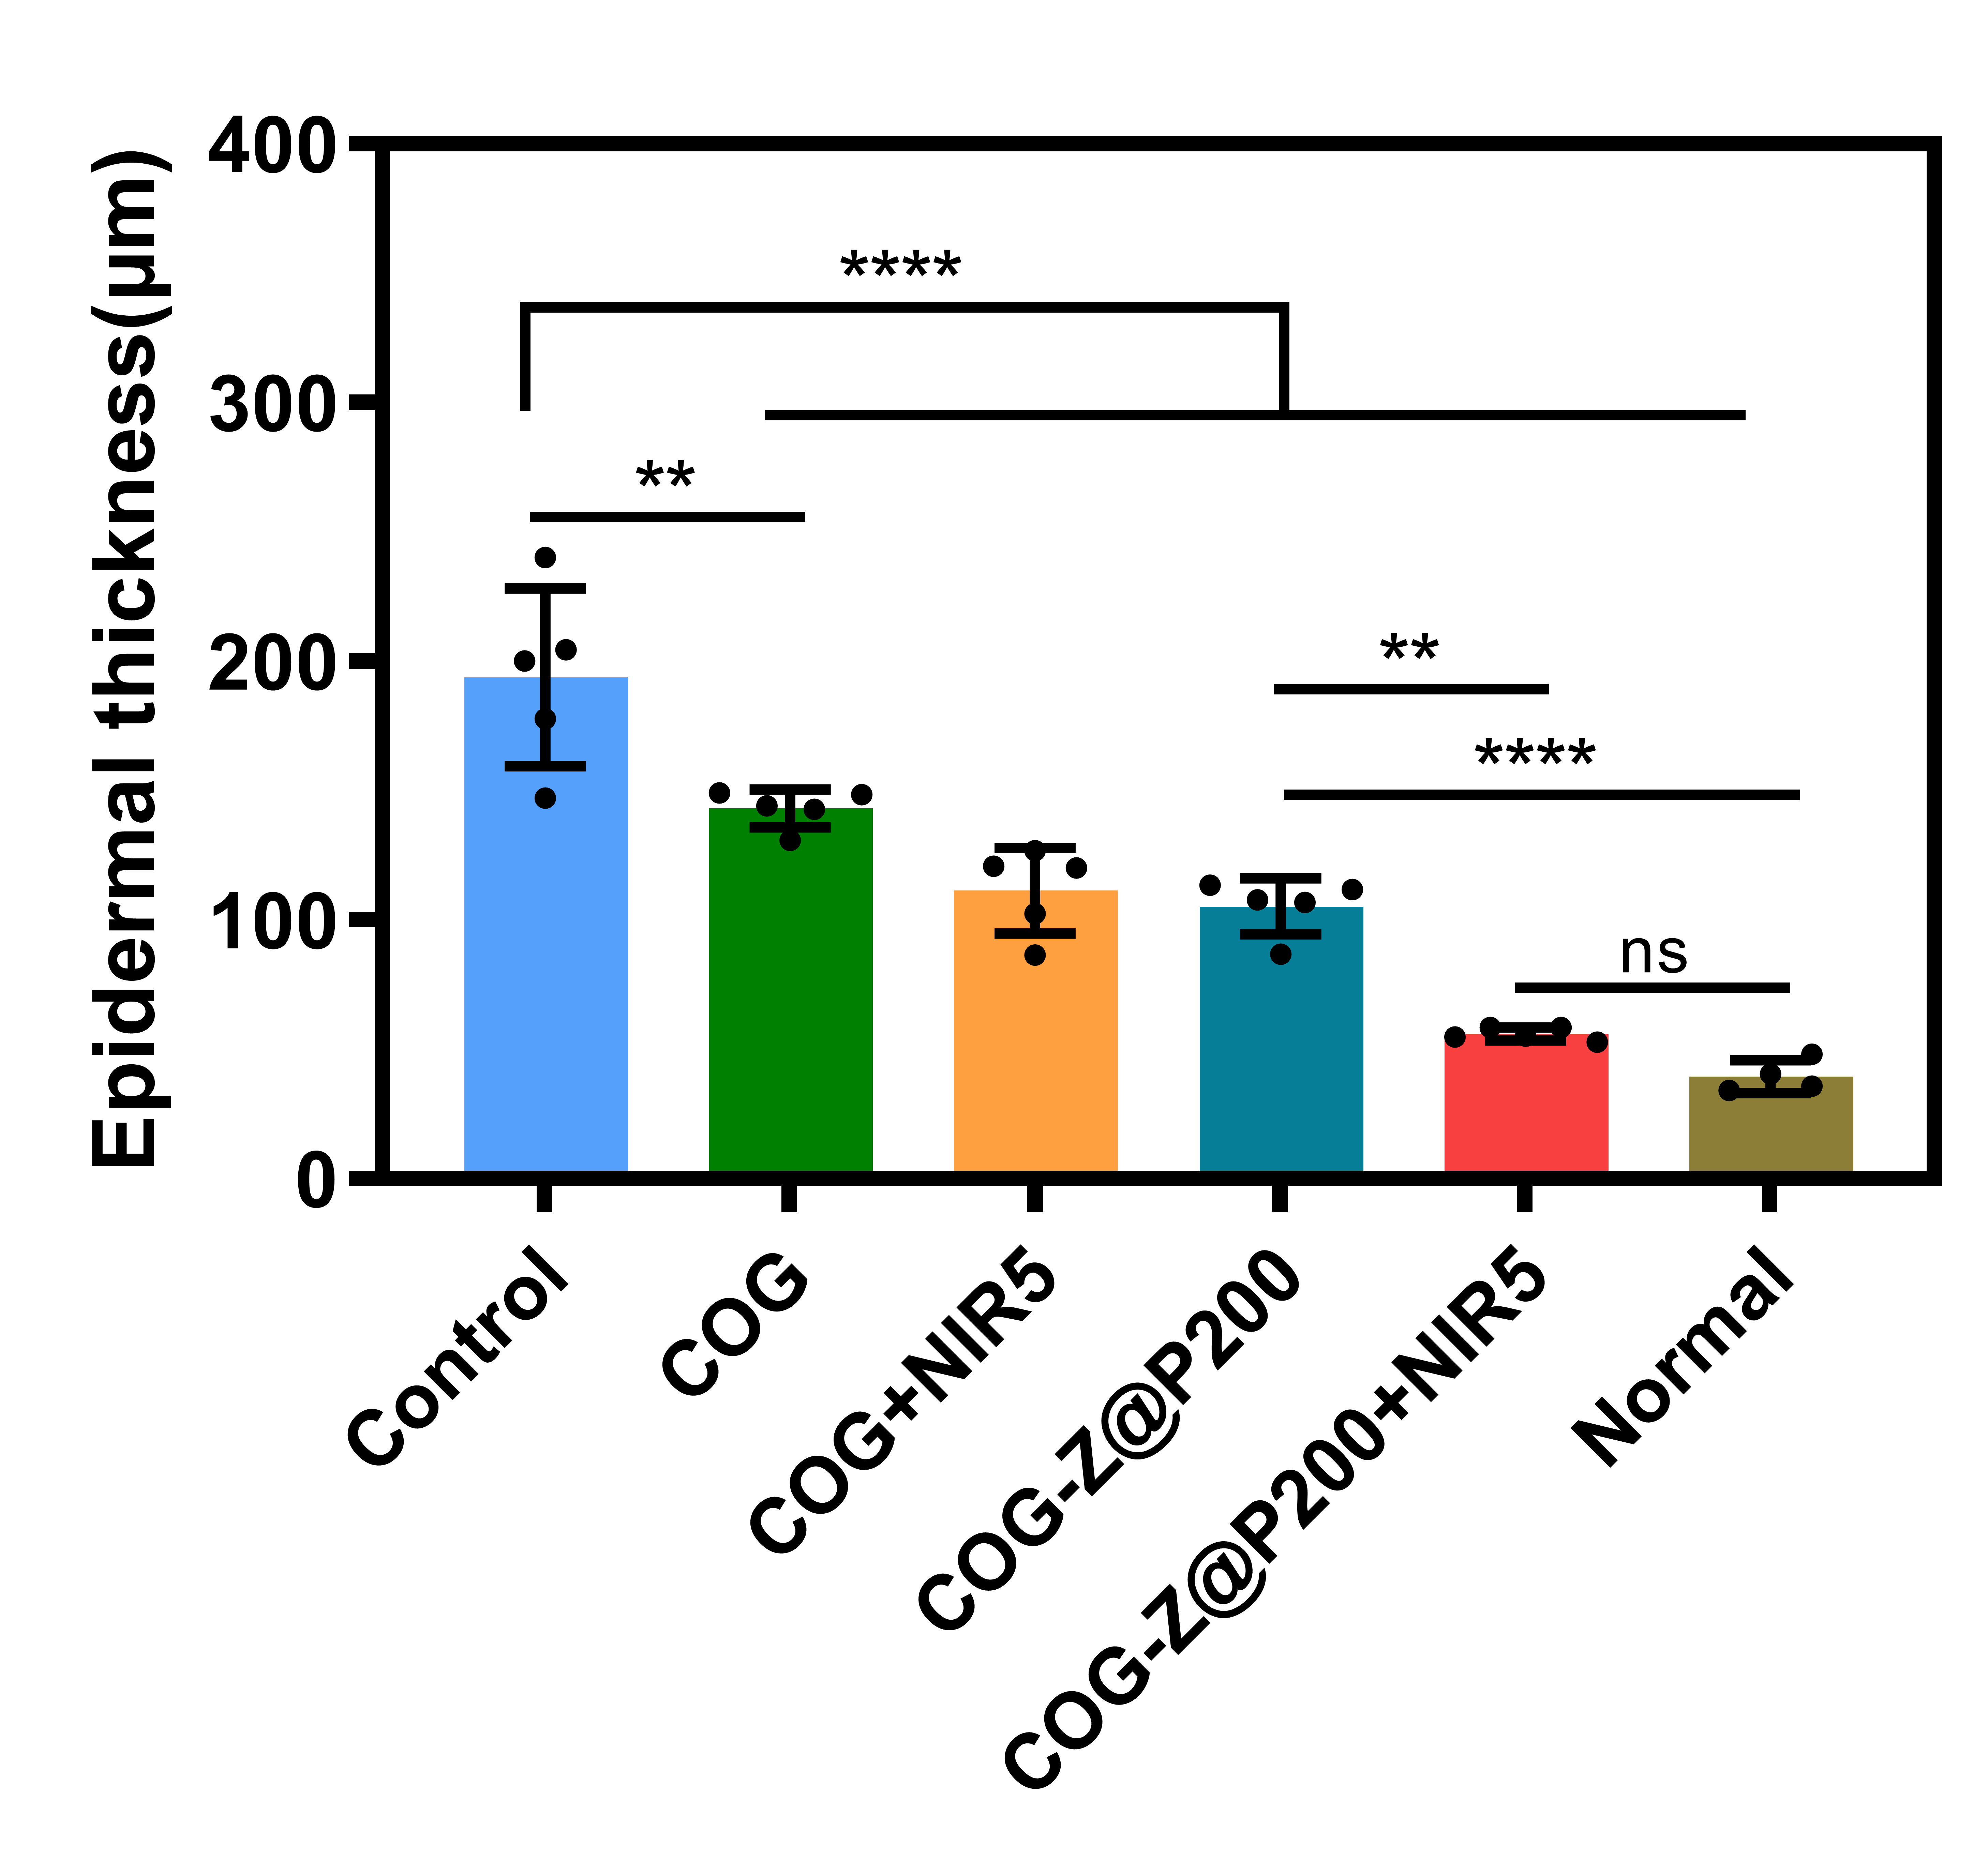


**Figure S9.** Statistics on the epidermal thickness of the skin tissue at the wound site of mice on day 14.


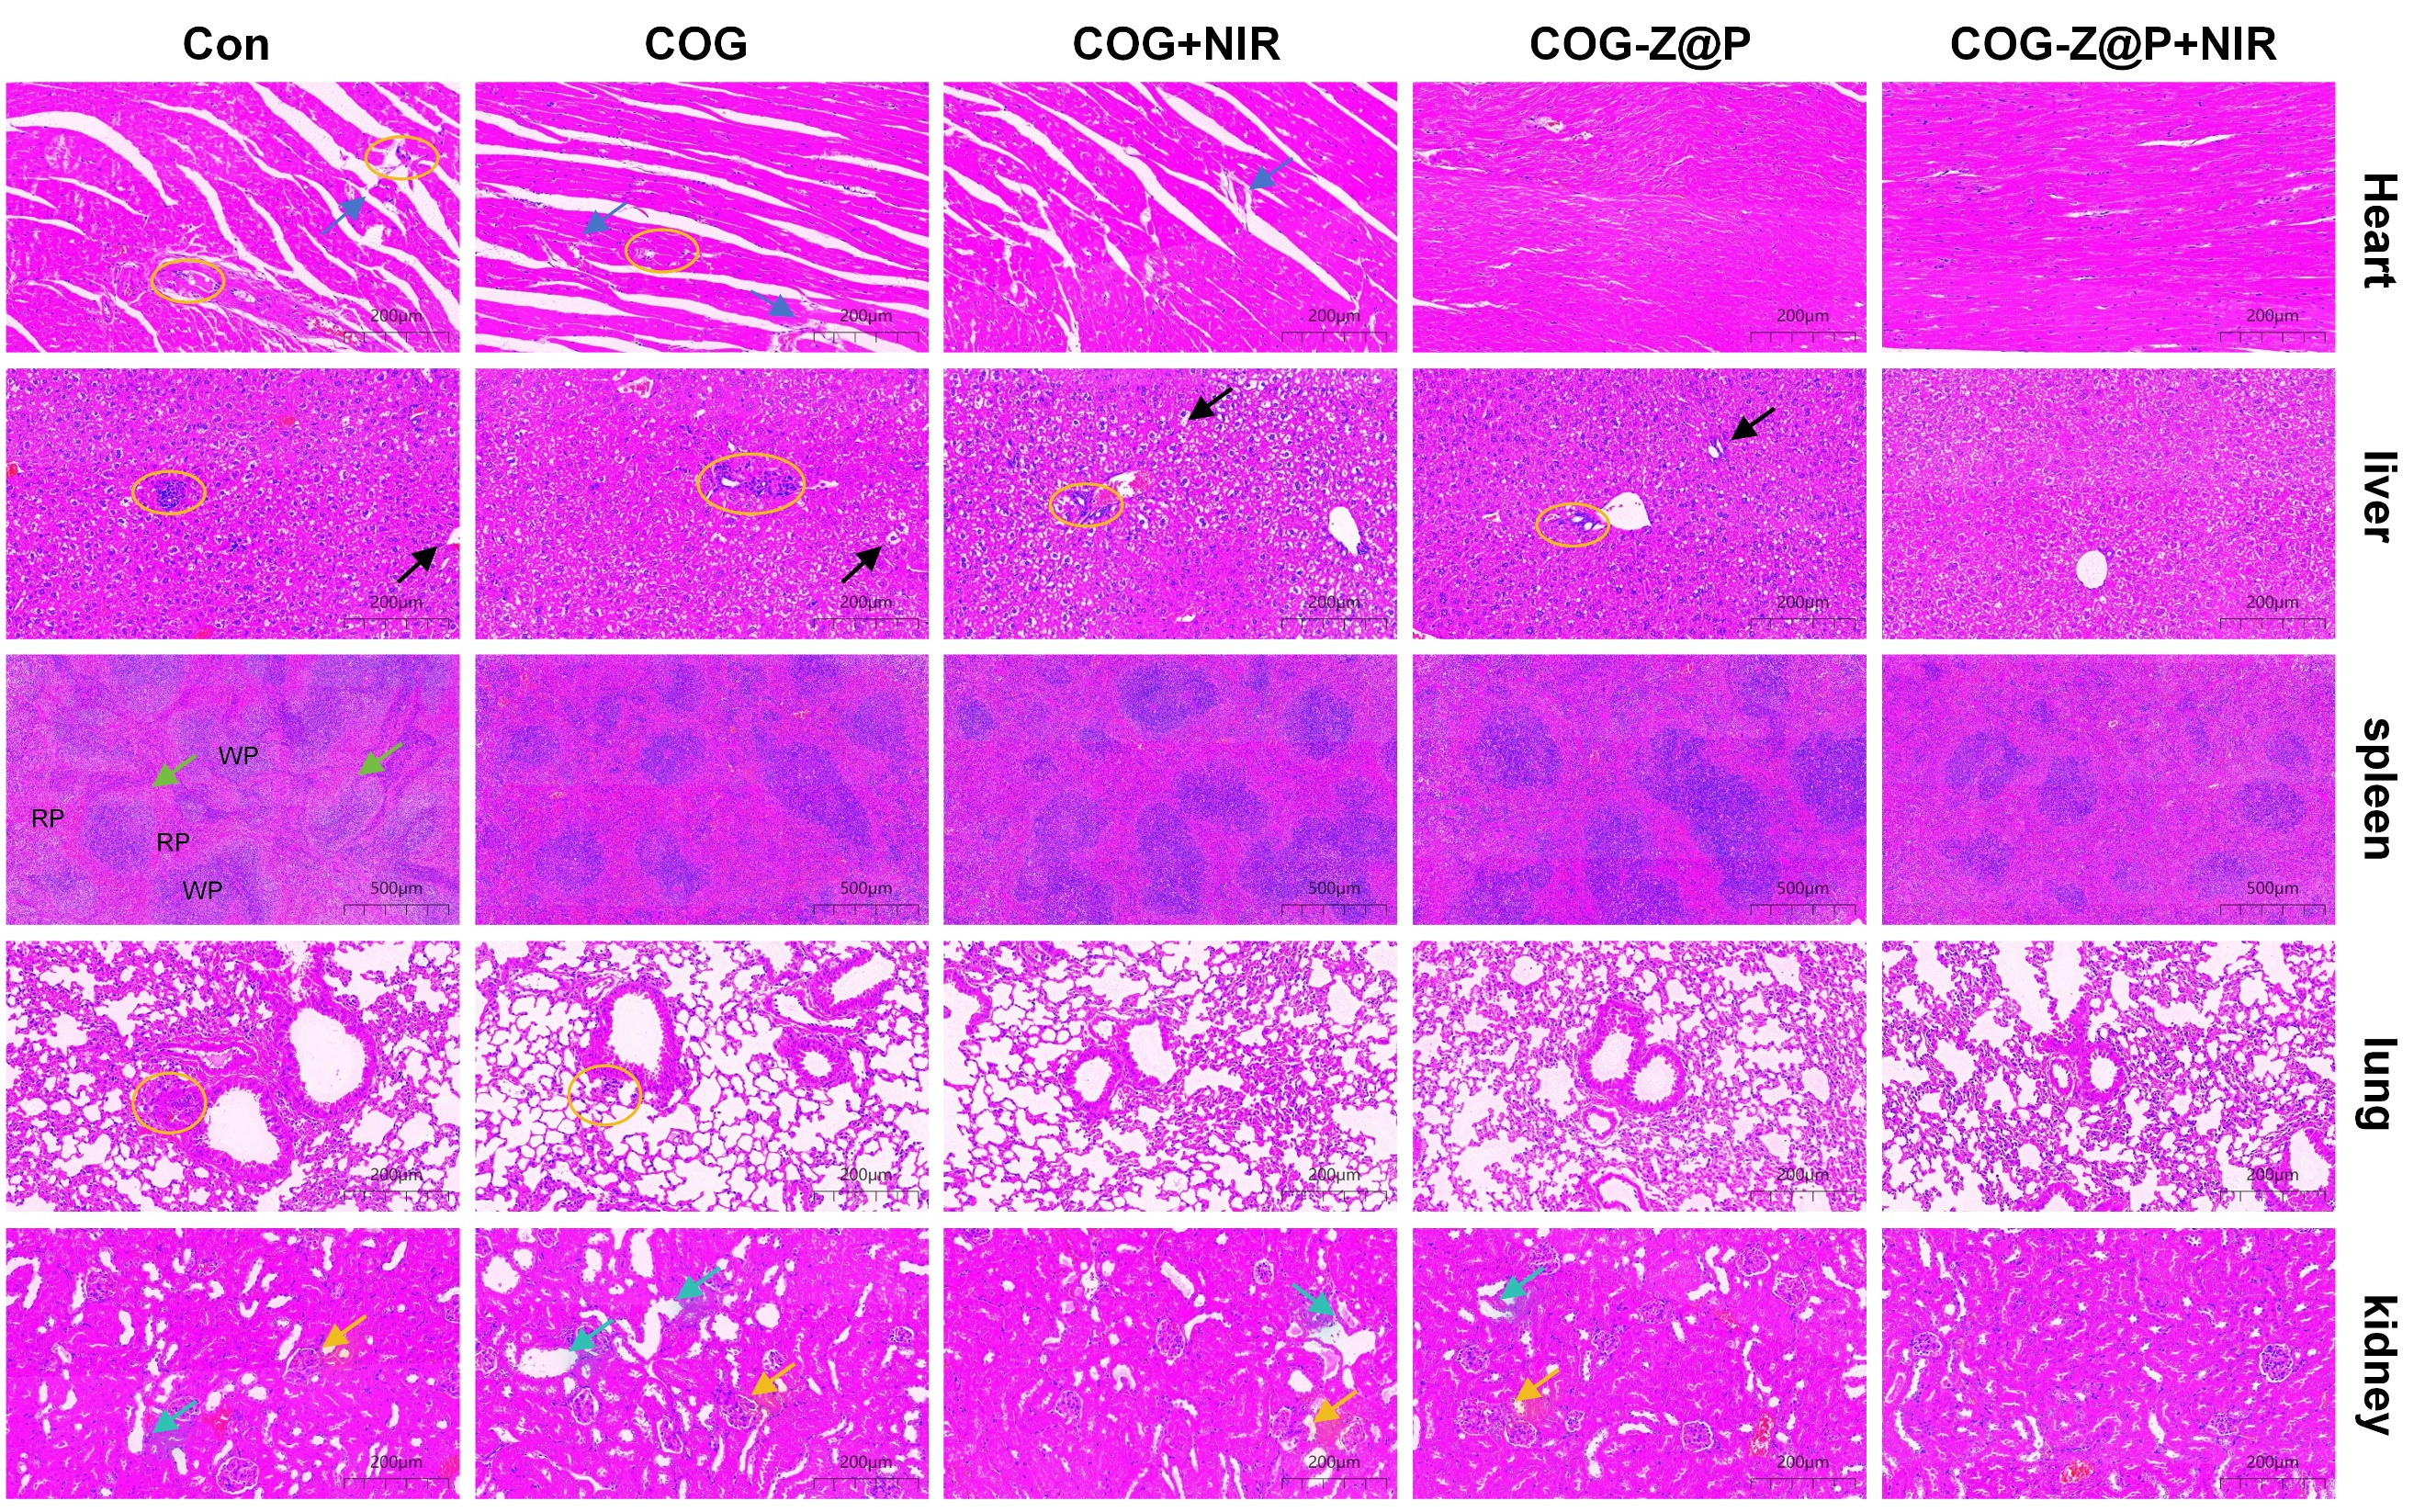


**Figure S10.** H&E staining images of major organs (heart, liver, spleen, lung, kidney) of mice after receiving COG-Z@P200 hydrogel photothermal treatment.


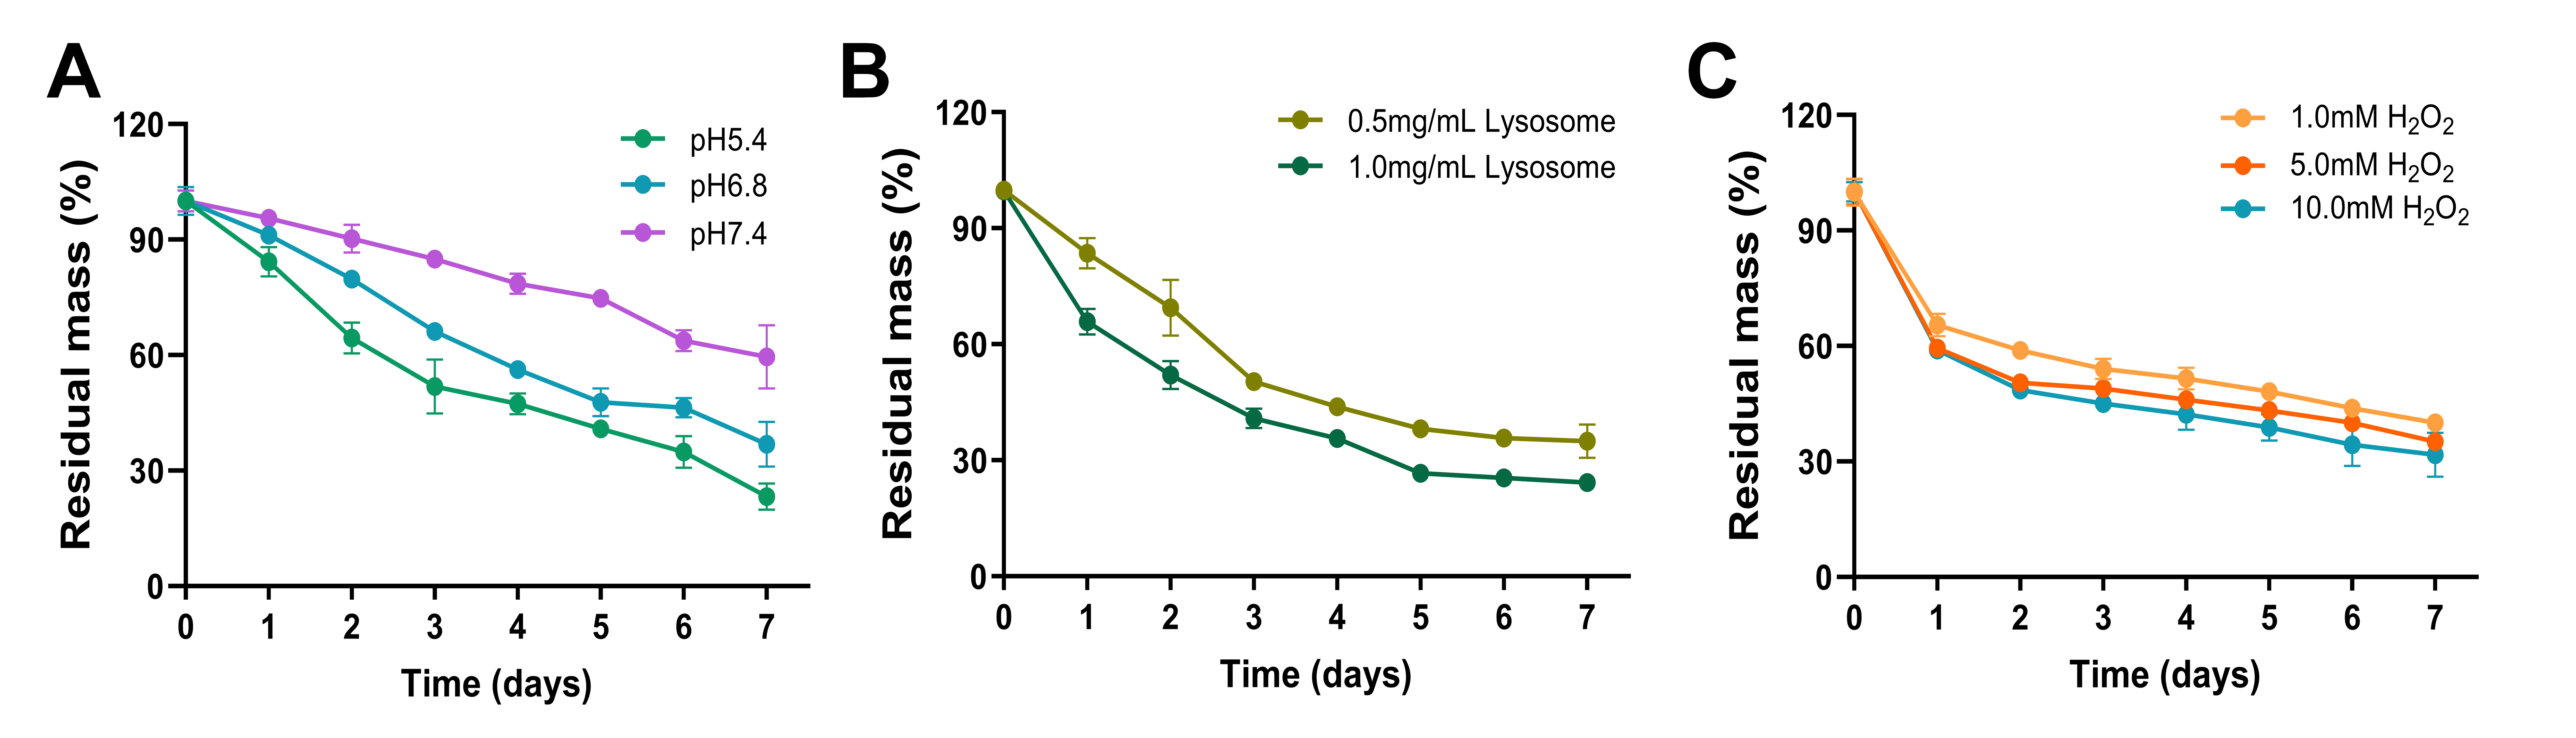


Figure S11. In vitro simulation of the effects of different pH, lysosome concentrations and H₂O₂ concentration gradients on hydrogel degradation


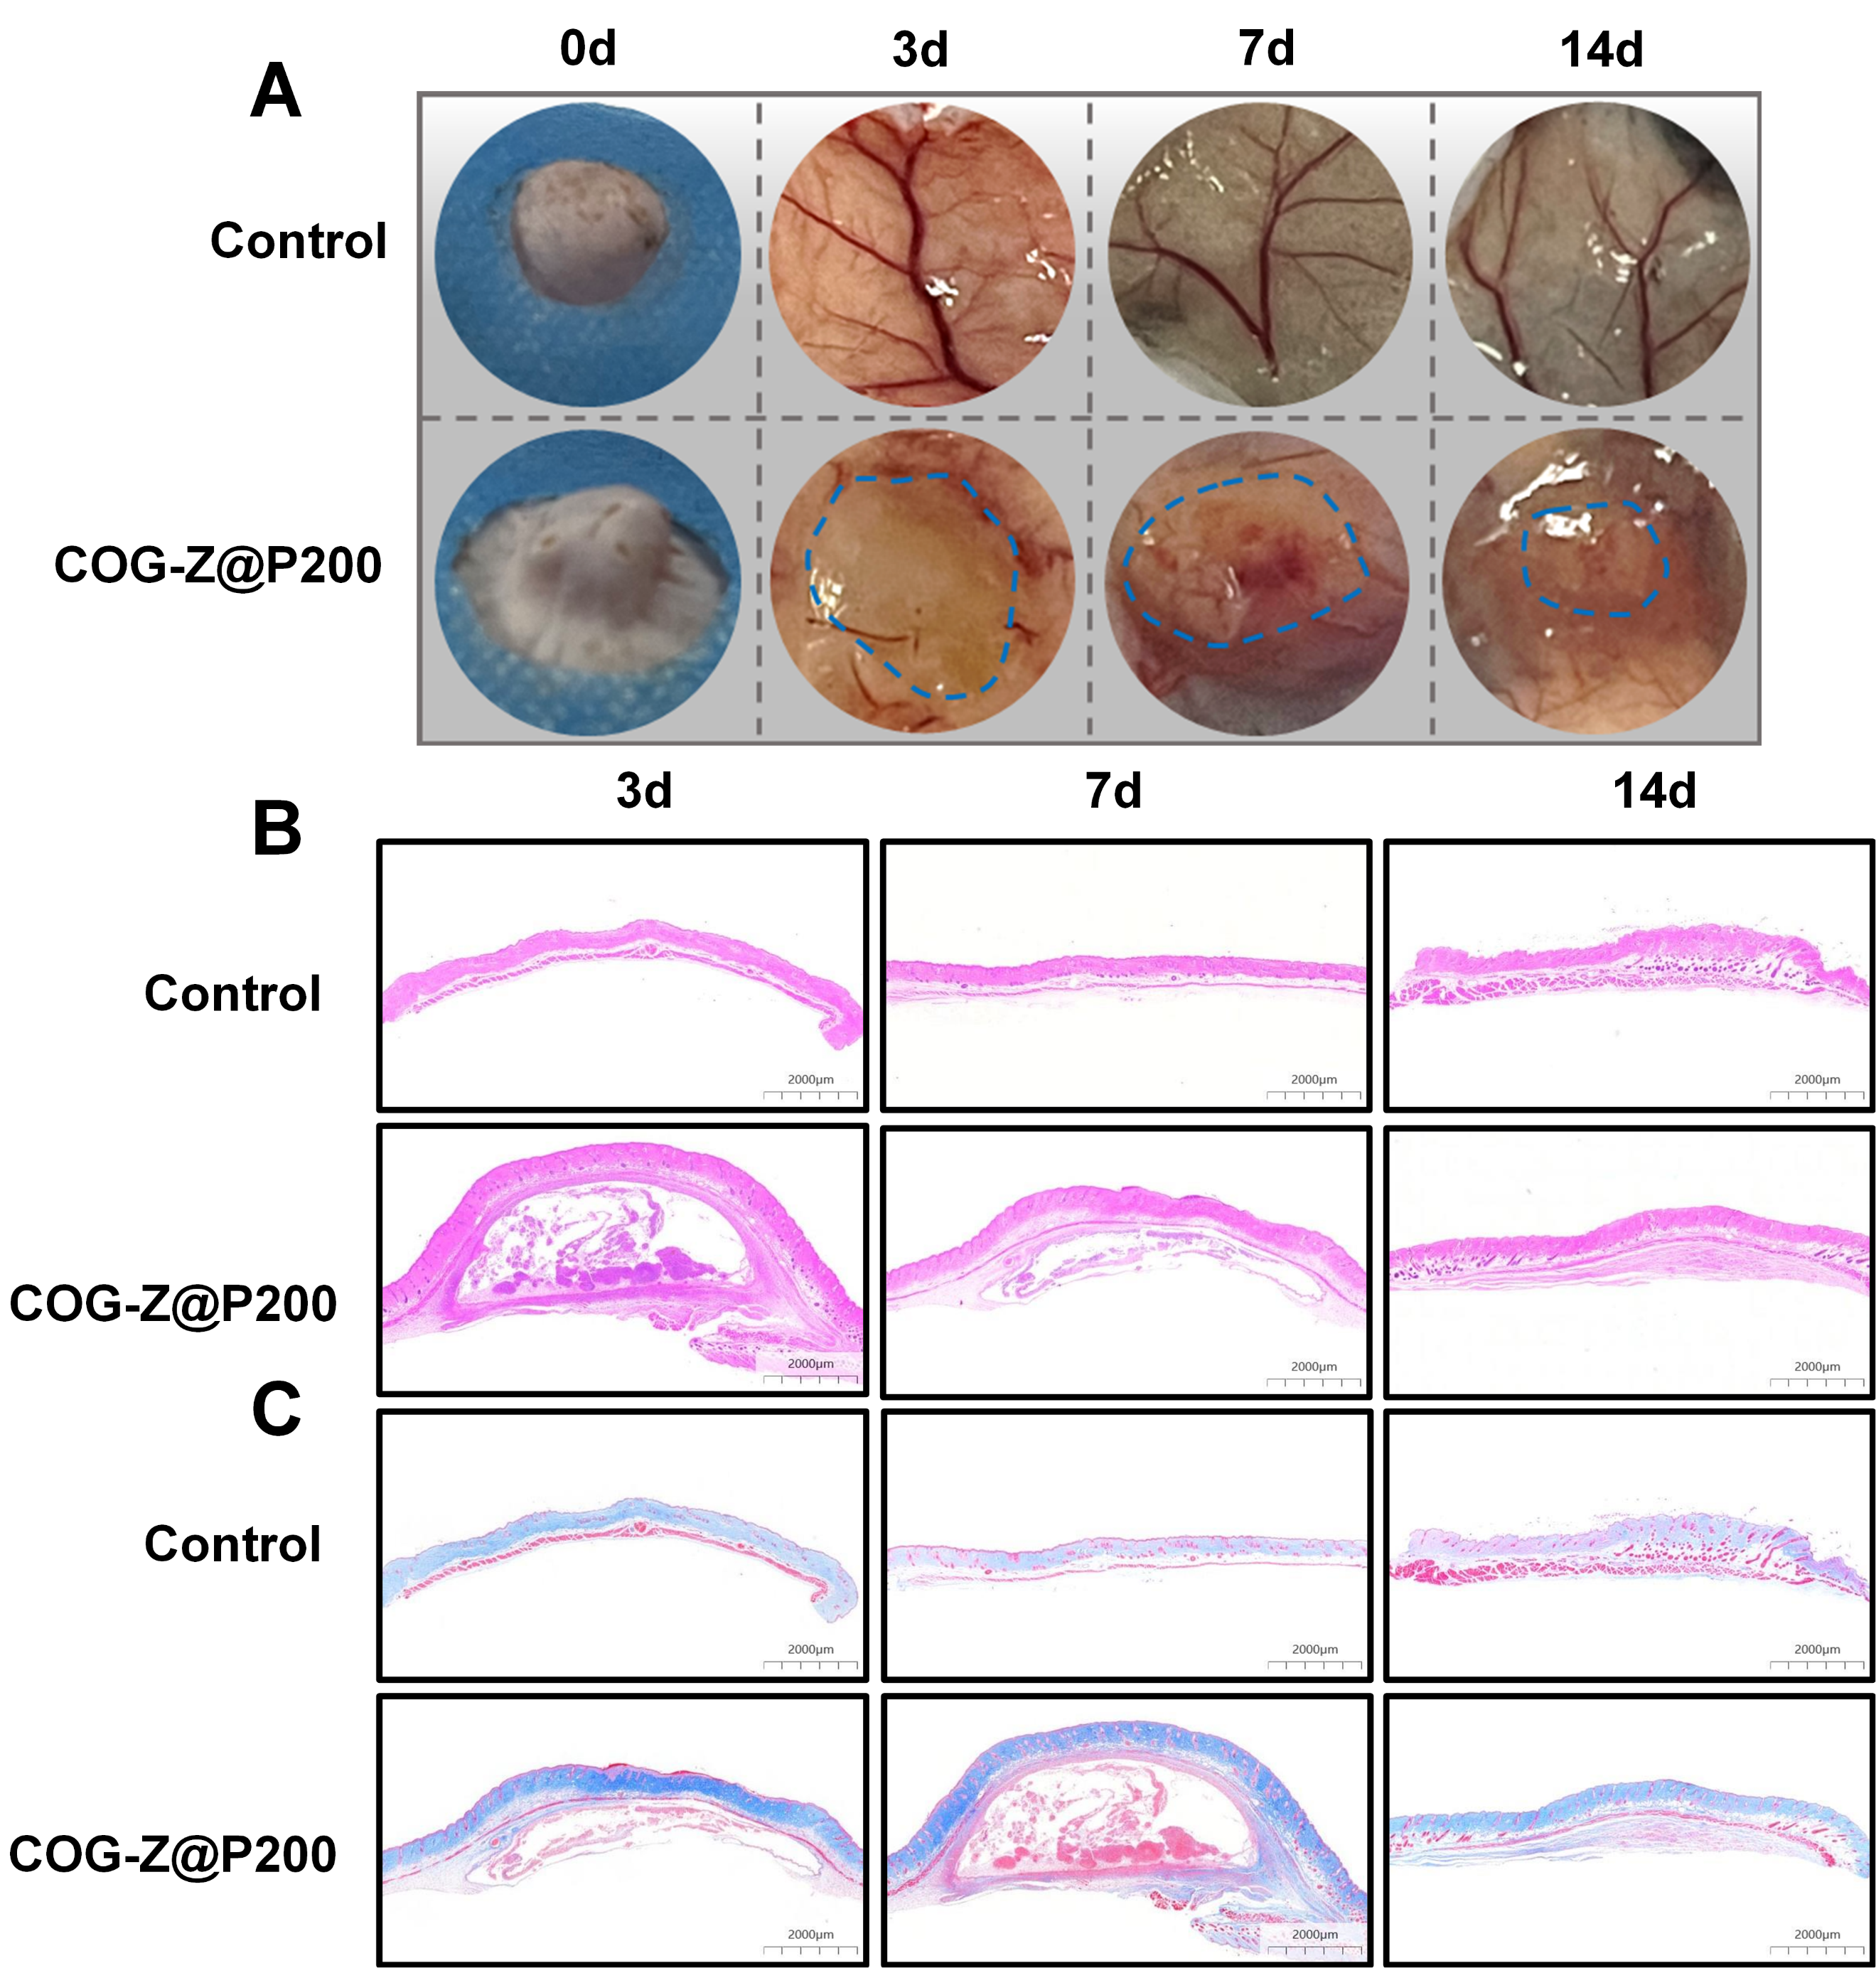


**Figure S12.** Subcutaneous degradation of COG-Z@P200 hydrogel. (A) Degradation picture; (B) HE staining; (C) Masson staining.


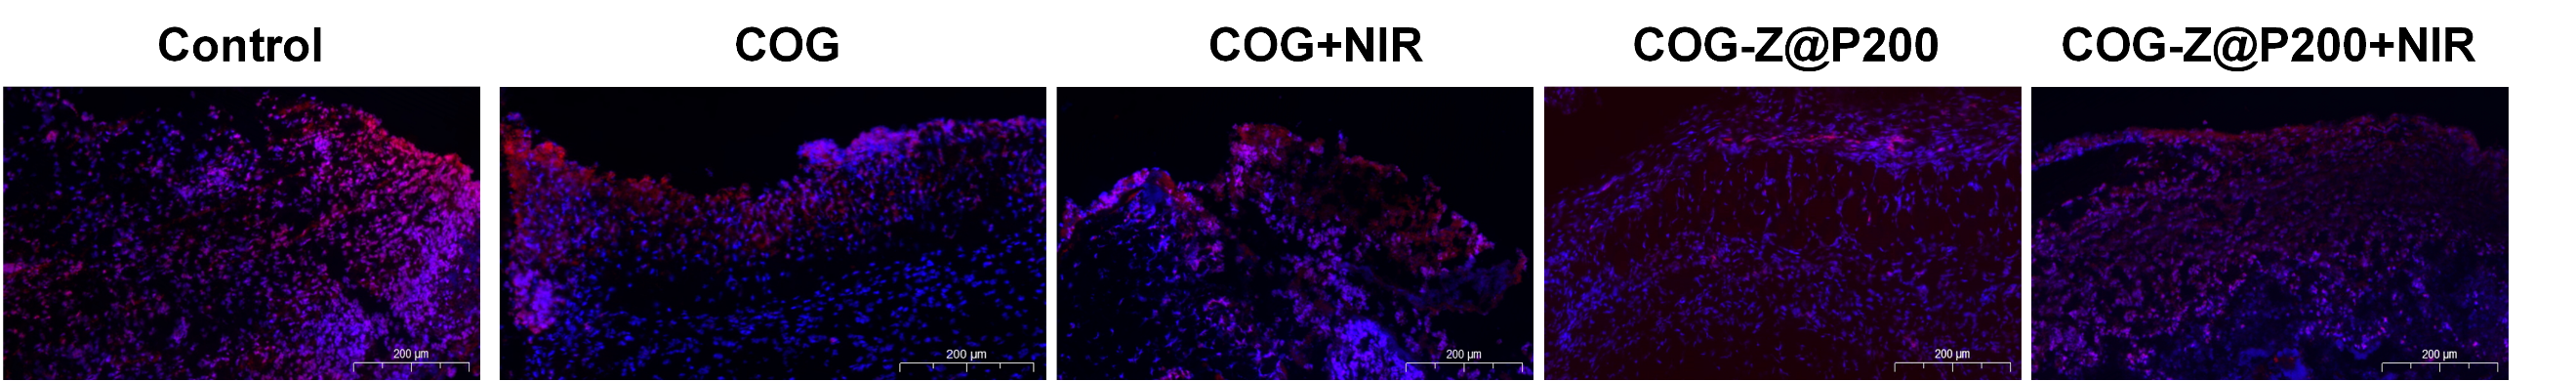


**Figure S13.** Fluorescent photos of DHE-stained wounds in each group on 3rd day.

**Table S1.** Summary for the RNASeq Outcomes of CTRL and Sample

| Sample Name | Raw  reads | Clean Reads | Clean Bases (bp) | Clean Error Rate (%) | Clean Q20(%) | Clean Q30(%) |
| --- | --- | --- | --- | --- | --- | --- |
| CTRL1 | 22248574 | 22104398 | 3267181270 | 0.0125 | 98.42 | 95.18 |
| CTRL2 | 25415196 | 25201136 | 3705792200 | 0.0125 | 98.39 | 95.1 |
| CTRL3 | 23021240 | 22832930 | 3377293190 | 0.0125 | 98.39 | 95.07 |
| Sample1 | 24965384 | 24821396 | 3683195174 | 0.0126 | 98.32 | 94.93 |
| Sample2 | 26133324 | 25936282 | 3849977942 | 0.0125 | 98.38 | 95.09 |
| Sample3 | 22614162 | 22446552 | 3319466206 | 0.0124 | 98.46 | 95.3 |

**Table S2. Advantages and limitations of different hydrogel wound dressings**

| **Properties** | **COG-Z@P200** | **Chitosan-based Dressings[1, 2]** | **Collagen-based Dressings[3, 4]** | **Silver Nanoparticle-based Dressings[5]** |
| --- | --- | --- | --- | --- |
| **Antibacterial Efficacy** | Highly effective against MRSA with dual-action: Zn²⁺ release and photothermal therapy NIR. Synergistic antibacterial effect. | Moderate antibacterial activity, mainly against Gram-positive bacteria through positive charge interaction with bacterial membranes. | Weaker antibacterial properties compared to others, mainly promoting healing. | Highly effective against a broad range of bacteria, including MRSA, but concerns over cytotoxicity and accumulation. |
| **Mechanical Properties** | High elasticity and gel strength, self-healing properties, maintains stability under dynamic conditions. | Flexible, but lacks mechanical strength under high tension, not ideal for all wound types. | Provides excellent biocompatibility and tissue regeneration, but may lack robustness for high-tension wounds. | Mechanical strength varies based on matrix material, silver nanoparticles do not contribute to mechanical integrity. |
| **Biodegradability** | Biodegradable, ZIF-8 and polydopamine break down into non-toxic byproducts. | Biodegradable, chitosan breaks down enzymatically in the body. | Collagen is naturally biodegradable and compatible with human tissue, degradation rate varies. | Biodegradable depending on the matrix, but concerns over silver accumulation in tissues over time. |
| **Wound Healing Potential** | Accelerates healing by preventing infection, promoting collagen deposition, re-epithelialization, and angiogenesis. | Good for tissue regeneration, supports moist wound healing but less effective in infection control. | Excellent for tissue regeneration, promoting a moist wound environment, but limited in infection control. | Effective in managing infection, but prolonged use may delay tissue regeneration and increase cytotoxicity risks. |

1. Rajinikanth BS, Rajkumar DSR, K K, Vijayaragavan V: **Chitosan-Based Biomaterial in Wound Healing: A Review.** *Cureus* 2024, **16:**e55193.

2. Liu H, Wang C, Li C, Qin Y, Wang Z, Yang F, Li Z, Wang J: **A functional chitosan-based hydrogel as a wound dressing and drug delivery system in the treatment of wound healing.** *RSC Adv* 2018, **8:**7533-7549.

3. Fleck CA, Simman R: **Modern collagen wound dressings: function and purpose.** *J Am Col Certif Wound Spec* 2010, **2:**50-54.

4. Brett D: **﻿﻿﻿A Review of Collagen and Collagen-based Wound Dressings.** *Wounds* 2008, **20:**347-356.

5. Kalantari K, Mostafavi E, Afifi AM, Izadiyan Z, Jahangirian H, Rafiee-Moghaddam R, Webster TJ: **Wound dressings functionalized with silver nanoparticles: promises and pitfalls.** *Nanoscale* 2020, **12:**2268-2291.
